# Supplementary material for: Global and regional trends in incidence and mortality of female breast cancer and associated factors at national level in 2000 to 2019
Source: PubMed Central journal article supplement — Chin Med J (Engl). 2021 Sep 28;135(1):42–51. doi: 10.1097/CM9.0000000000001814 (PMC8850868; doi:10.1097/cm9.0000000000001814), 2021-09-28
Supplement: cm9-135-042-s001.pdf [file cm9-135-042-s001.pdf]

## Online Supplementary Materials

### 1. Supplementary Tables and Figures

**Supplementary Table 1.** The data sources for the prevalence of risk factors

**Supplementary Table 2.** Joinpoint analysis for breast cancer, age-standardized incidence in 2000-2019 for female, all age

**Supplementary Table 3.** Joinpoint analysis for breast cancer, age-standardized mortality in 2000-2019 for female, all age

**Supplementary Table 4.** Joinpoint analysis for breast cancer, age-standardized incidence in 2000-2019 for female, younger than 40 years

**Supplementary Table 5.** Joinpoint analysis for breast cancer, age-standardized mortality in 2000-2019 for female, younger than 40 years

**Supplementary Table 6.** Joinpoint analysis for breast cancer, age-standardized incidence in 2000-2019 for female, 40 years or older

**Supplementary Table 7.** Joinpoint analysis for breast cancer, age-standardized mortality in 2000-2019 for female, 40 years or older

**Supplementary Table 8.** Analysis of the association between the risk factor exposure at the national level and female breast cancer incidence

**Supplementary Table 9.** Analysis of the association between the risk factor exposure at the national level and female breast cancer mortality

**Supplementary Table 1. The data source for the prevalence of risk factors**

| <b>Risk factors</b>              | <b>Measurement</b>                                                    | <b>Year</b> |
|----------------------------------|-----------------------------------------------------------------------|-------------|
| Alcohol <sup>a</sup>             | Total (recorded + unrecorded) per capita (15+) consumption            | 2015        |
| Smoking <sup>b</sup>             | Current smoking of any tobacco product (age-standardized rate)        | 2015        |
| Physical inactivity <sup>c</sup> | Prevalence of insufficient physical activity (age-standardized rate)  | 2016*       |
| Obesity <sup>d</sup>             | Prevalence of obesity among adults, (BMI $\geq$ 30, age-standardized) | 2015        |
| High cholesterol <sup>e</sup>    | Raised total cholesterol ( $\geq$ 6.2 mmol/L, age-standardized)       | 2008*       |
| Education <sup>f</sup>           | Gross enrolment ratio, primary, both sexes (%)                        | *           |
| Unemployment <sup>f</sup>        | Unemployment, total (% of total labor force)                          | 2015        |
| Out-of-pocket <sup>f</sup>       | Out-of-pocket expenditure (% of current health expenditure)           | 2015        |
| GDP <sup>f</sup>                 | GDP per capita growth (annual %)                                      | 2015        |
| Health expenditure <sup>f</sup>  | Current health expenditure (% of GDP)                                 | 2015        |
| Health system <sup>f</sup>       | Physicians (per 1,000 people)                                         | *           |
| UHC <sup>g</sup>                 | UHC service coverage index                                            | 2015        |
| BC screening <sup>h</sup>        | Existence of national screening program for breast cancer             | 2015        |

\*Selected year of these factors were between 2010-2019 as they were not available for 2015 in some countries.

Abbreviation: BMI, body mass index; UHC, universal health coverage; GDP, gross national income.

- a. [https://www.who.int/data/gho/data/indicators/indicator-details/GHO/alcohol-total-\(recorded-unrecorded\)-per-capita-\(15-\)-consumption-with-95-ci-projections-to-2025](https://www.who.int/data/gho/data/indicators/indicator-details/GHO/alcohol-total-(recorded-unrecorded)-per-capita-(15-)-consumption-with-95-ci-projections-to-2025)
- b. <https://www.who.int/data/gho/data/indicators/indicator-details/GHO/current-tobacco-smoking-age-standardised>
- c. [https://www.who.int/data/gho/data/indicators/indicator-details/GHO/prevalence-of-insufficient-physical-activity-among-adults-aged-18-years-\(age-standardized-estimate\)-\(-\)](https://www.who.int/data/gho/data/indicators/indicator-details/GHO/prevalence-of-insufficient-physical-activity-among-adults-aged-18-years-(age-standardized-estimate)-(-))
- d. [https://www.who.int/data/gho/data/indicators/indicator-details/GHO/prevalence-of-obesity-among-adults-bmi--30-\(age-standardized-estimate\)-\(-\)](https://www.who.int/data/gho/data/indicators/indicator-details/GHO/prevalence-of-obesity-among-adults-bmi--30-(age-standardized-estimate)-(-))
- e. [https://www.who.int/data/gho/data/indicators/indicator-details/GHO/chol\\_05](https://www.who.int/data/gho/data/indicators/indicator-details/GHO/chol_05)
- f. <https://databank.worldbank.org/source/world-development-indicators>
- g. <https://www.who.int/data/gho/data/indicators/indicator-details/GHO/uhc-index-of-service-coverage>
- h. <https://www.who.int/data/gho/data/indicators/indicator-details/GHO/existence-of-national-screening-program-for-breast-cancer>

**Supplementary Table 2. Joinpoint analysis for breast cancer, age-standardized incidence in 2000-2019 for female, all age**

| Country             | Trend 1   |       |                | Trend 2   |       |                | Trend 3   |       |                | Trend 4   |       |                | Year      | AAPC  | Range          |
|---------------------|-----------|-------|----------------|-----------|-------|----------------|-----------|-------|----------------|-----------|-------|----------------|-----------|-------|----------------|
|                     | Year      | EAPC  | range          |           |       |                |
| Antigua and Barbuda | 2000-2019 | 1.82  | 1.59 to 2.06   |           |       |                |           |       |                |           |       |                | 2000-2019 | 1.82  | 1.59 to 2.06   |
| Argentina           | 2000-2015 | -0.30 | -0.48 to -0.11 | 2015-2019 | 1.42  | 0.18 to 2.68   |           |       |                |           |       |                | 2000-2019 | 0.06  | -0.21 to 0.34  |
| Australia           | 2000-2019 | -1.04 | -1.15 to -0.93 |           |       |                |           |       |                |           |       |                | 2000-2019 | -1.04 | -1.15 to -0.93 |
| Austria             | 2000-2019 | -0.80 | -0.95 to -0.64 |           |       |                |           |       |                |           |       |                | 2000-2019 | -0.80 | -0.95 to -0.64 |
| Barbados            | 2000-2003 | 3.04  | 2.01 to 4.09   | 2003-2006 | -0.23 | -2.08 to 1.65  | 2006-2011 | 3.13  | 2.57 to 3.69   | 2011-2019 | -0.64 | -0.81 to -0.47 | 2000-2019 | 0.98  | 0.66 to 1.31   |
| Belgium             | 2000-2019 | -1.04 | -1.19 to -0.90 |           |       |                |           |       |                |           |       |                | 2000-2019 | -1.04 | -1.19 to -0.90 |
| Brazil              | 2000-2011 | 0.30  | 0.13 to 0.48   | 2011-2019 | -0.60 | -0.84 to -0.37 |           |       |                |           |       |                | 2000-2019 | -0.08 | -0.21 to 0.05  |
| Canada              | 2000-2013 | -1.12 | -1.28 to -0.96 | 2013-2019 | 0.67  | 0.17 to 1.17   |           |       |                |           |       |                | 2000-2019 | -0.56 | -0.73 to -0.38 |
| Chile               | 2000-2013 | 1.57  | 1.26 to 1.88   | 2013-2019 | -0.07 | -0.88 to 0.75  |           |       |                |           |       |                | 2000-2019 | 1.05  | 0.74 to 1.36   |
| China               | 2000-2010 | 3.20  | 3.00 to 3.41   | 2010-2016 | 1.44  | 0.99 to 1.90   | 2016-2019 | 3.95  | 3.01 to 4.90   |           |       |                | 2000-2019 | 2.76  | 2.55 to 2.97   |
| Colombia            | 2000-2006 | 0.36  | -0.47 to 1.20  | 2006-2015 | 2.10  | 1.65 to 2.56   | 2015-2019 | 0.09  | -1.02 to 1.20  |           |       |                | 2000-2019 | 1.12  | 0.75 to 1.50   |
| Costa Rica          | 2000-2019 | 1.30  | 0.98 to 1.62   |           |       |                |           |       |                |           |       |                | 2000-2019 | 1.30  | 0.98 to 1.62   |
| Croatia             | 2000-2015 | 1.40  | 1.16 to 1.65   | 2015-2019 | -3.64 | -5.32 to -1.92 |           |       |                |           |       |                | 2000-2019 | 0.32  | -0.06 to 0.71  |
| Cuba                | 2000-2019 | 0.80  | 0.64 to 0.97   |           |       |                |           |       |                |           |       |                | 2000-2019 | 0.80  | 0.64 to 0.97   |
| Denmark             | 2000-2006 | 0.48  | -0.18 to 1.15  | 2006-2009 | 2.08  | -1.58 to 5.88  | 2009-2014 | -3.90 | -5.02 to -2.76 | 2014-2019 | -0.79 | -1.65 to 0.09  | 2000-2019 | -0.77 | -1.39 to -0.15 |

|            |           |       |                |           |       |                |           |       |                |           |           |               |                |       |               |
|------------|-----------|-------|----------------|-----------|-------|----------------|-----------|-------|----------------|-----------|-----------|---------------|----------------|-------|---------------|
| Ecuador    | 2000-2004 | 7.86  | 4.24 to 11.61  | 2004-2019 | 1.69  | 1.35 to 2.03   |           |       |                |           | 2000-2019 | 2.96          | 2.24 to 3.69   |       |               |
| Estonia    | 2000-2019 | 0.35  | 0.13 to 0.57   |           |       |                |           |       |                |           | 2000-2019 | 0.35          | 0.13 to 0.57   |       |               |
| Fiji       | 2000-2005 | 0.64  | -0.12 to 1.41  | 2005-2008 | 6.11  | 2.94 to 9.39   | 2008-2019 | 1.09  | 0.91 to 1.27   |           | 2000-2019 | 1.75          | 1.26 to 2.23   |       |               |
| Finland    | 2000-2010 | 0.94  | 0.43 to 1.46   | 2010-2019 | -1.59 | -2.17 to -1.01 |           |       |                |           | 2000-2019 | -0.27         | -0.62 to 0.09  |       |               |
| France     | 2000-2003 | 2.41  | 0.52 to 4.34   | 2003-2009 | -0.45 | -1.24 to 0.35  | 2009-2019 | -1.43 | -1.71 to -1.16 |           | 2000-2019 | -0.53         | -0.90 to -0.15 |       |               |
| Germany    | 2000-2009 | 0.51  | 0.24 to 0.79   | 2009-2019 | -0.81 | -1.03 to -0.58 |           |       |                |           | 2000-2019 | -0.18         | -0.35 to -0.02 |       |               |
| Greece     | 2000-2007 | 1.06  | 0.21 to 1.91   | 2007-2019 | -0.41 | -0.78 to -0.05 |           |       |                |           | 2000-2019 | 0.12          | -0.23 to 0.48  |       |               |
| Grenada    | 2000-2004 | 0.00  | -2.62 to 2.70  | 2004-2012 | 3.49  | 2.50 to 4.49   | 2012-2019 | 1.32  | 0.48 to 2.17   |           | 2000-2019 | 1.95          | 1.26 to 2.64   |       |               |
| Guatemala  | 2000-2012 | 2.52  | 2.27 to 2.78   | 2012-2019 | 0.37  | -0.05 to 0.80  |           |       |                |           | 2000-2019 | 1.73          | 1.52 to 1.93   |       |               |
| Guyana     | 2000-2006 | -1.90 | -2.74 to -1.04 | 2006-2013 | 1.60  | 0.78 to 2.43   | 2013-2019 | -0.07 | -0.79 to 0.67  |           | 2000-2019 | -0.04         | -0.46 to 0.38  |       |               |
| Hungary    | 2000-2004 | 0.58  | -0.96 to 2.14  | 2004-2009 | -3.56 | -5.09 to -2.00 | 2009-2019 | 0.20  | -0.21 to 0.61  |           | 2000-2019 | -0.73         | -1.24 to -0.21 |       |               |
| Iceland    | 2000-2004 | -0.21 | -1.11 to 0.69  | 2004-2010 | -3.45 | -4.06 to -2.84 | 2010-2019 | -0.97 | -1.23 to -0.71 |           | 2000-2019 | -1.60         | -1.87 to -1.34 |       |               |
| Israel     | 2000-2009 | -0.60 | -0.96 to -0.23 | 2009-2012 | -3.09 | -6.71 to 0.66  | 2012-2019 | -0.31 | -0.80 to 0.18  |           | 2000-2019 | -0.89         | -1.47 to -0.31 |       |               |
| Italy      | 2000-2003 | 0.69  | -0.99 to 2.40  | 2003-2019 | -0.97 | -1.10 to -0.84 |           |       |                |           | 2000-2019 | -0.71         | -0.97 to -0.45 |       |               |
| Japan      | 2000-2011 | 2.67  | 2.40 to 2.94   | 2011-2019 | -0.61 | -1.00 to -0.22 |           |       |                |           | 2000-2019 | 1.28          | 1.07 to 1.49   |       |               |
| Kuwait     | 2000-2005 | -1.08 | -3.04 to 0.92  | 2005-2008 | 5.11  | -2.99 to 13.89 | 2008-2015 | -3.50 | -4.60 to -2.38 | 2015-2019 | 0.16      | -1.66 to 2.01 | 2000-2019      | -0.77 | -2.04 to 0.51 |
| Kyrgyzstan | 2000-2019 | -0.28 | -0.41 to -0.16 |           |       |                |           |       |                |           | 2000-2019 | -0.28         | -0.41 to -0.16 |       |               |
| Latvia     | 2000-2006 | 3.39  | 2.30 to 4.49   | 2006-2019 | -0.35 | -0.67 to -0.04 |           |       |                |           | 2000-2019 | 0.81          | 0.44 to 1.18   |       |               |
| Lithuania  | 2000-2008 | 1.69  | 0.77 to 2.62   | 2008-2019 | -1.06 | -1.64 to -0.48 |           |       |                |           | 2000-2019 | 0.09          | -0.38 to 0.56  |       |               |

|                     |           |       |                |           |       |                |           |       |                |           |       |                |           |       |                |
|---------------------|-----------|-------|----------------|-----------|-------|----------------|-----------|-------|----------------|-----------|-------|----------------|-----------|-------|----------------|
| Luxembourg          | 2000-2010 | 0.28  | -0.15 to 0.72  | 2010-2019 | -2.93 | -3.40 to -2.47 |           |       |                |           |       |                | 2000-2019 | -1.25 | -1.55 to -0.96 |
| Malta               | 2000-2004 | 0.63  | -0.44 to 1.71  | 2004-2013 | -1.13 | -1.49 to -0.77 | 2013-2019 | 0.16  | -0.40 to 0.73  |           |       |                | 2000-2019 | -0.35 | -0.65 to -0.05 |
| Mauritius           | 2000-2003 | 4.97  | 1.66 to 8.39   | 2003-2007 | 0.20  | -2.62 to 3.10  | 2007-2017 | 2.84  | 2.38 to 3.30   | 2017-2019 | -0.09 | -4.36 to 4.38  | 2000-2019 | 2.30  | 1.47 to 3.13   |
| Mexico              | 2000-2019 | 1.21  | 1.08 to 1.34   |           |       |                |           |       |                |           |       |                | 2000-2019 | 1.21  | 1.08 to 1.34   |
| Netherlands         | 2000-2011 | -0.02 | -0.28 to 0.23  | 2011-2014 | -2.68 | -6.16 to 0.93  | 2014-2019 | 0.79  | -0.03 to 1.61  |           |       |                | 2000-2019 | -0.24 | -0.80 to 0.33  |
| New Zealand         | 2000-2019 | 0.09  | -0.02 to 0.20  |           |       |                |           |       |                |           |       |                | 2000-2019 | 0.09  | -0.02 to 0.20  |
| Norway              | 2000-2011 | -0.25 | -0.63 to 0.14  | 2011-2019 | -2.93 | -3.52 to -2.34 |           |       |                |           |       |                | 2000-2019 | -1.39 | -1.69 to -1.08 |
| Panama              | 2000-2006 | 0.42  | -0.30 to 1.14  | 2006-2014 | 3.00  | 2.52 to 3.48   | 2014-2019 | 0.97  | 0.32 to 1.63   |           |       |                | 2000-2019 | 1.64  | 1.33 to 1.96   |
| Philippines         | 2000-2007 | -1.45 | -1.71 to -1.19 | 2007-2010 | 1.75  | -0.08 to 3.61  | 2010-2013 | 4.05  | 2.33 to 5.79   | 2013-2019 | 1.05  | 0.80 to 1.30   | 2000-2019 | 0.69  | 0.34 to 1.05   |
| Poland              | 2000-2003 | 0.09  | -1.36 to 1.56  | 2003-2008 | 1.91  | 1.02 to 2.82   | 2008-2015 | 0.32  | -0.13 to 0.78  | 2015-2019 | -0.89 | -1.70 to -0.06 | 2000-2019 | 0.45  | 0.09 to 0.80   |
| Puerto Rico         | 2000-2019 | 0.80  | 0.53 to 1.06   |           |       |                |           |       |                |           |       |                | 2000-2019 | 0.80  | 0.53 to 1.06   |
| Republic of Korea   | 2000-2009 | 4.81  | 4.36 to 5.27   | 2009-2019 | 0.74  | 0.46 to 1.02   |           |       |                |           |       |                | 2000-2019 | 2.65  | 2.41 to 2.89   |
| Republic of Moldova | 2000-2009 | 1.77  | 1.17 to 2.37   | 2009-2012 | -3.06 | -8.88 to 3.14  | 2012-2015 | 4.02  | -2.21 to 10.64 | 2015-2019 | -3.90 | -5.74 to -2.03 | 2000-2019 | 0.13  | -1.14 to 1.41  |
| Romania             | 2000-2019 | 0.98  | 0.81 to 1.16   |           |       |                |           |       |                |           |       |                | 2000-2019 | 0.98  | 0.81 to 1.16   |
| Saint Lucia         | 2000-2008 | -0.54 | -1.50 to 0.43  | 2008-2012 | 3.82  | -0.13 to 7.92  | 2012-2019 | 0.57  | -0.33 to 1.49  |           |       |                | 2000-2019 | 0.78  | -0.10 to 1.66  |
| Serbia              | 2000-2002 | -1.14 | -5.03 to 2.91  | 2002-2009 | 1.98  | 1.31 to 2.66   | 2009-2019 | 0.50  | 0.21 to 0.79   |           |       |                | 2000-2019 | 0.87  | 0.41 to 1.33   |
| Singapore           | 2000-2012 | 1.70  | 1.39 to 2.01   | 2012-2019 | -1.86 | -2.41 to -1.31 |           |       |                |           |       |                | 2000-2019 | 0.37  | 0.11 to 0.63   |
| Slovakia            | 2000-2004 | -1.53 | -3.24 to 0.22  | 2004-2011 | 2.37  | 1.47 to 3.29   | 2011-2019 | -0.08 | -0.60 to 0.44  |           |       |                | 2000-2019 | 0.51  | 0.02 to 1.00   |
| Slovenia            | 2000-2019 | -0.85 | -1.06 to -0.64 |           |       |                |           |       |                |           |       |                | 2000-2019 | -0.85 | -1.06 to -0.64 |

|                          |           |       |                |           |       |                |           |       |                |  |           |       |                |
|--------------------------|-----------|-------|----------------|-----------|-------|----------------|-----------|-------|----------------|--|-----------|-------|----------------|
| Spain                    | 2000-2008 | 0.15  | -0.27 to 0.58  | 2008-2019 | -0.67 | -0.91 to -0.43 |           |       |                |  | 2000-2019 | -0.32 | -0.53 to -0.12 |
| Sweden                   | 2000-2004 | 1.13  | -0.36 to 2.65  | 2004-2013 | -0.52 | -1.01 to -0.03 | 2013-2019 | -1.74 | -2.48 to -0.98 |  | 2000-2019 | -0.56 | -0.97 to -0.15 |
| Switzerland              | 2000-2012 | -1.15 | -1.40 to -0.91 | 2012-2015 | -3.95 | -7.94 to 0.22  | 2015-2019 | 0.22  | -1.12 to 1.57  |  | 2000-2019 | -1.32 | -1.97 to -0.65 |
| Trinidad and Tobago      | 2000-2008 | 1.97  | 1.29 to 2.66   | 2008-2019 | -0.45 | -0.80 to -0.09 |           |       |                |  | 2000-2019 | 0.56  | 0.24 to 0.89   |
| United Kingdom           | 2000-2008 | -0.35 | -0.61 to -0.09 | 2008-2013 | -1.32 | -2.05 to -0.59 | 2013-2019 | 0.28  | -0.11 to 0.68  |  | 2000-2019 | -0.41 | -0.64 to -0.18 |
| United States of America | 2000-2007 | -1.75 | -2.08 to -1.43 | 2007-2014 | -1.06 | -1.46 to -0.66 | 2014-2019 | -0.40 | -0.93 to 0.13  |  | 2000-2019 | -1.14 | -1.36 to -0.93 |
| Uruguay                  | 2000-2019 | -0.32 | -0.43 to -0.21 |           |       |                |           |       |                |  | 2000-2019 | -0.32 | -0.43 to -0.21 |

---

**Supplementary Table 3. Joinpoint analysis for breast cancer, age-standardized mortality in 2000-2019 for female, all age**

| Country             | Trend 1   |       |                | Trend 2   |       |                | Trend 3   |       |                | Trend 4   |       |                | Year      | AAPC  | Range          |
|---------------------|-----------|-------|----------------|-----------|-------|----------------|-----------|-------|----------------|-----------|-------|----------------|-----------|-------|----------------|
|                     | Year      | EAPC  | range          |           |       |                |
| Antigua and Barbuda | 2000-2005 | -0.55 | -0.83 to -0.27 | 2005-2009 | 0.63  | 0.05 to 1.22   | 2009-2015 | 2.56  | 2.32 to 2.80   | 2015-2019 | -0.51 | -0.80 to -0.21 | 2000-2019 | 0.68  | 0.53 to 0.83   |
| Argentina           | 2000-2003 | -0.06 | -1.33 to 1.23  | 2003-2014 | -1.30 | -1.50 to -1.11 | 2014-2019 | 0.09  | -0.44 to 0.63  |           |       |                | 2000-2019 | -0.74 | -0.98 to -0.50 |
| Australia           | 2000-2005 | -2.40 | -2.89 to -1.91 | 2005-2017 | -1.15 | -1.30 to -1.01 | 2017-2019 | 0.21  | -1.80 to 2.25  |           |       |                | 2000-2019 | -1.34 | -1.58 to -1.11 |
| Austria             | 2000-2019 | -1.46 | -1.54 to -1.38 |           |       |                |           |       |                |           |       |                | 2000-2019 | -1.46 | -1.54 to -1.38 |
| Barbados            | 2000-2003 | 1.99  | 1.10 to 2.90   | 2003-2006 | -0.94 | -2.57 to 0.72  | 2006-2011 | 1.61  | 1.11 to 2.11   | 2011-2019 | -0.67 | -0.82 to -0.51 | 2000-2019 | 0.30  | 0.01 to 0.59   |
| Belgium             | 2000-2008 | -2.61 | -2.99 to -2.22 | 2008-2019 | -1.43 | -1.68 to -1.18 |           |       |                |           |       |                | 2000-2019 | -1.93 | -2.13 to -1.73 |
| Brazil              | 2000-2016 | -1.07 | -1.14 to -1.01 | 2016-2019 | -2.01 | -2.72 to -1.30 |           |       |                |           |       |                | 2000-2019 | -1.22 | -1.34 to -1.11 |
| Canada              | 2000-2013 | -2.07 | -2.15 to -1.98 | 2013-2019 | 0.00  | -0.28 to 0.27  |           |       |                |           |       |                | 2000-2019 | -1.42 | -1.52 to -1.32 |
| Chile               | 2000-2007 | -0.96 | -1.22 to -0.69 | 2007-2010 | 0.48  | -1.42 to 2.41  | 2010-2019 | -0.93 | -1.09 to -0.77 |           |       |                | 2000-2019 | -0.72 | -1.01 to -0.42 |
| China               | 2000-2004 | 0.41  | -0.15 to 0.98  | 2004-2007 | -1.60 | -3.26 to 0.08  | 2007-2016 | -0.50 | -0.67 to -0.33 | 2016-2019 | 1.39  | 0.67 to 2.12   | 2000-2019 | -0.19 | -0.47 to 0.10  |
| Colombia            | 2000-2007 | -0.85 | -1.47 to -0.22 | 2007-2016 | 0.09  | -0.36 to 0.54  | 2016-2019 | -1.57 | -3.42 to 0.32  |           |       |                | 2000-2019 | -0.52 | -0.91 to -0.13 |
| Costa Rica          | 2000-2019 | 0.26  | -0.01 to 0.53  |           |       |                |           |       |                |           |       |                | 2000-2019 | 0.26  | -0.01 to 0.53  |
| Croatia             | 2000-2015 | 0.24  | 0.01 to 0.48   | 2015-2019 | -3.96 | -5.64 to -2.25 |           |       |                |           |       |                | 2000-2019 | -0.66 | -1.04 to -0.28 |
| Cuba                | 2000-2019 | -0.01 | -0.17 to 0.15  |           |       |                |           |       |                |           |       |                | 2000-2019 | -0.01 | -0.17 to 0.15  |
| Denmark             | 2000-2005 | -2.39 | -2.83 to -1.94 | 2005-2009 | -1.25 | -2.26 to -0.24 | 2009-2014 | -4.21 | -4.85 to -3.57 | 2014-2019 | -1.20 | -1.68 to -0.71 | 2000-2019 | -2.32 | -2.60 to -2.04 |

|            |           |       |                |           |       |                |           |       |                |           |       |                |           |       |                |
|------------|-----------|-------|----------------|-----------|-------|----------------|-----------|-------|----------------|-----------|-------|----------------|-----------|-------|----------------|
| Ecuador    | 2000-2005 | 4.79  | 2.69 to 6.93   | 2005-2019 | 0.55  | 0.22 to 0.88   |           |       |                |           |       |                | 2000-2019 | 1.65  | 1.10 to 2.20   |
| Estonia    | 2000-2013 | -2.35 | -2.71 to -2.00 | 2013-2019 | 0.21  | -1.03 to 1.47  |           |       |                |           |       |                | 2000-2019 | -1.55 | -1.97 to -1.13 |
| Fiji       | 2000-2005 | 0.83  | -0.07 to 1.73  | 2005-2009 | 4.28  | 2.48 to 6.12   | 2009-2019 | 0.44  | 0.21 to 0.68   |           |       |                | 2000-2019 | 1.34  | 0.93 to 1.76   |
| Finland    | 2000-2012 | -1.28 | -1.43 to -1.13 | 2012-2015 | -2.36 | -4.86 to 0.20  | 2015-2019 | -0.83 | -1.66 to 0.00  |           |       |                | 2000-2019 | -1.36 | -1.76 to -0.95 |
| France     | 2000-2002 | -0.30 | -2.46 to 1.91  | 2002-2016 | -2.22 | -2.33 to -2.10 | 2016-2019 | -0.57 | -1.70 to 0.57  |           |       |                | 2000-2019 | -1.76 | -2.03 to -1.49 |
| Germany    | 2000-2007 | -1.56 | -1.79 to -1.34 | 2007-2019 | -0.82 | -0.92 to -0.72 |           |       |                |           |       |                | 2000-2019 | -1.10 | -1.19 to -1.00 |
| Greece     | 2000-2007 | -0.78 | -1.11 to -0.45 | 2007-2014 | -1.52 | -1.94 to -1.10 | 2014-2019 | 0.75  | 0.18 to 1.33   |           |       |                | 2000-2019 | -0.66 | -0.88 to -0.43 |
| Grenada    | 2000-2005 | 0.58  | 0.16 to 1.01   | 2005-2011 | 3.13  | 2.75 to 3.52   | 2011-2017 | 1.71  | 1.38 to 2.05   | 2017-2019 | -2.12 | -3.51 to -0.71 | 2000-2019 | 1.45  | 1.23 to 1.66   |
| Guatemala  | 2000-2008 | 0.90  | 0.59 to 1.22   | 2008-2011 | 2.17  | -0.29 to 4.68  | 2011-2016 | 0.68  | -0.03 to 1.38  | 2016-2019 | -1.30 | -2.30 to -0.29 | 2000-2019 | 0.69  | 0.28 to 1.10   |
| Guyana     | 2000-2006 | -1.54 | -2.33 to -0.74 | 2006-2014 | 0.92  | 0.32 to 1.52   | 2014-2019 | -1.34 | -2.24 to -0.42 |           |       |                | 2000-2019 | -0.46 | -0.84 to -0.07 |
| Hungary    | 2000-2003 | 0.32  | -1.97 to 2.67  | 2003-2009 | -3.81 | -4.84 to -2.77 | 2009-2019 | -0.64 | -1.03 to -0.24 |           |       |                | 2000-2019 | -1.50 | -1.98 to -1.02 |
| Iceland    | 2000-2004 | -2.39 | -3.07 to -1.71 | 2004-2010 | -3.60 | -4.08 to -3.11 | 2010-2019 | -1.46 | -1.66 to -1.25 |           |       |                | 2000-2019 | -2.33 | -2.54 to -2.12 |
| Israel     | 2000-2015 | -2.77 | -2.87 to -2.67 | 2015-2019 | -0.18 | -0.93 to 0.58  |           |       |                |           |       |                | 2000-2019 | -2.23 | -2.39 to -2.07 |
| Italy      | 2000-2006 | -2.30 | -2.74 to -1.86 | 2006-2019 | -1.24 | -1.38 to -1.09 |           |       |                |           |       |                | 2000-2019 | -1.57 | -1.73 to -1.42 |
| Japan      | 2000-2011 | 0.83  | 0.66 to 1.01   | 2011-2019 | -1.01 | -1.29 to -0.74 |           |       |                |           |       |                | 2000-2019 | 0.05  | -0.09 to 0.19  |
| Kuwait     | 2000-2009 | 0.29  | -0.53 to 1.12  | 2009-2015 | -5.58 | -7.22 to -3.92 | 2015-2019 | -0.95 | -3.14 to 1.29  |           |       |                | 2000-2019 | -1.86 | -2.58 to -1.13 |
| Kyrgyzstan | 2000-2019 | -1.41 | -1.54 to -1.29 |           |       |                |           |       |                |           |       |                | 2000-2019 | -1.41 | -1.54 to -1.29 |
| Latvia     | 2000-2006 | 1.68  | 0.80 to 2.57   | 2006-2019 | -1.62 | -1.90 to -1.35 |           |       |                |           |       |                | 2000-2019 | -0.59 | -0.90 to -0.28 |
| Lithuania  | 2000-2008 | 1.10  | 0.37 to 1.84   | 2008-2019 | -1.97 | -2.44 to -1.51 |           |       |                |           |       |                | 2000-2019 | -0.69 | -1.06 to -0.31 |



|                     |           |       |                |           |       |                |           |       |                |           |       |                |           |       |                |
|---------------------|-----------|-------|----------------|-----------|-------|----------------|-----------|-------|----------------|-----------|-------|----------------|-----------|-------|----------------|
| Luxembourg          | 2000-2003 | -3.09 | -4.84 to -1.31 | 2003-2011 | -1.19 | -1.67 to -0.71 | 2011-2017 | -3.21 | -3.99 to -2.43 | 2017-2019 | -0.87 | -4.35 to 2.73  | 2000-2019 | -2.10 | -2.59 to -1.61 |
| Malta               | 2000-2013 | -2.35 | -2.47 to -2.24 | 2013-2019 | -1.27 | -1.66 to -0.88 |           |       |                |           |       |                | 2000-2019 | -2.01 | -2.15 to -1.88 |
| Mauritius           | 2000-2003 | 4.64  | 1.51 to 7.86   | 2003-2007 | -0.36 | -3.03 to 2.39  | 2007-2017 | 2.18  | 1.74 to 2.62   | 2017-2019 | -1.19 | -5.24 to 3.04  | 2000-2019 | 1.66  | 0.88 to 2.45   |
| Mexico              | 2000-2019 | 0.33  | 0.20 to 0.45   |           |       |                |           |       |                |           |       |                | 2000-2019 | 0.33  | 0.20 to 0.45   |
| Netherlands         | 2000-2003 | -3.98 | -4.56 to -3.38 | 2003-2011 | -1.18 | -1.34 to -1.01 | 2011-2014 | -2.47 | -3.66 to -1.26 | 2014-2019 | -0.03 | -0.31 to 0.24  | 2000-2019 | -1.53 | -1.73 to -1.33 |
| New Zealand         | 2000-2014 | -1.84 | -1.97 to -1.71 | 2014-2019 | -0.44 | -1.05 to 0.18  |           |       |                |           |       |                | 2000-2019 | -1.48 | -1.65 to -1.30 |
| Norway              | 2000-2006 | -2.57 | -2.91 to -2.24 | 2006-2013 | -1.92 | -2.26 to -1.58 | 2013-2017 | -3.16 | -4.15 to -2.15 | 2017-2019 | -0.46 | -2.51 to 1.64  | 2000-2019 | -2.24 | -2.53 to -1.94 |
| Panama              | 2000-2002 | -1.18 | -3.48 to 1.17  | 2002-2010 | 1.43  | 1.14 to 1.71   | 2010-2013 | 2.79  | 0.94 to 4.66   | 2013-2019 | -1.24 | -1.52 to -0.96 | 2000-2019 | 0.51  | 0.16 to 0.87   |
| Philippines         | 2000-2007 | -1.97 | -2.21 to -1.73 | 2007-2011 | 0.99  | 0.15 to 1.84   | 2011-2015 | 2.54  | 1.77 to 3.32   | 2015-2019 | 0.19  | -0.24 to 0.62  | 2000-2019 | 0.04  | -0.19 to 0.28  |
| Poland              | 2000-2019 | -0.89 | -0.98 to -0.80 |           |       |                |           |       |                |           |       |                | 2000-2019 | -0.89 | -0.98 to -0.80 |
| Puerto Rico         | 2000-2019 | -0.42 | -0.63 to -0.20 |           |       |                |           |       |                |           |       |                | 2000-2019 | -0.42 | -0.63 to -0.20 |
| Republic of Korea   | 2000-2010 | 0.77  | 0.64 to 0.89   | 2010-2013 | 0.08  | -1.31 to 1.50  | 2013-2016 | -1.26 | -2.59 to 0.08  | 2016-2019 | -0.13 | -0.78 to 0.53  | 2000-2019 | 0.19  | -0.09 to 0.48  |
| Republic of Moldova | 2000-2009 | 1.31  | 0.82 to 1.79   | 2009-2012 | -4.09 | -8.83 to 0.90  | 2012-2015 | 2.06  | -3.06 to 7.46  | 2015-2019 | -5.02 | -6.57 to -3.44 | 2000-2019 | -0.80 | -1.84 to 0.25  |
| Romania             | 2000-2019 | -0.21 | -0.37 to -0.06 |           |       |                |           |       |                |           |       |                | 2000-2019 | -0.21 | -0.37 to -0.06 |
| Saint Lucia         | 2000-2008 | -1.55 | -2.02 to -1.08 | 2008-2019 | 1.20  | 0.94 to 1.45   |           |       |                |           |       |                | 2000-2019 | 0.03  | -0.20 to 0.26  |
| Serbia              | 2000-2002 | -1.99 | -4.89 to 1.00  | 2002-2005 | 1.40  | -1.59 to 4.47  | 2005-2019 | -0.69 | -0.83 to -0.55 |           |       |                | 2000-2019 | -0.50 | -1.02 to 0.02  |
| Singapore           | 2000-2007 | -1.11 | -1.66 to -0.55 | 2007-2012 | -0.08 | -1.25 to 1.10  | 2012-2019 | -2.59 | -3.04 to -2.15 |           |       |                | 2000-2019 | -1.39 | -1.75 to -1.03 |
| Slovakia            | 2000-2004 | -3.46 | -4.88 to -2.01 | 2004-2012 | 0.90  | 0.29 to 1.52   | 2012-2019 | -1.26 | -1.83 to -0.69 |           |       |                | 2000-2019 | -0.83 | -1.24 to -0.42 |
| Slovenia            | 2000-2019 | -2.48 | -2.67 to -2.29 |           |       |                |           |       |                |           |       |                | 2000-2019 | -2.48 | -2.67 to -2.29 |

|                          |           |       |                |           |       |                |           |       |                |           |       |                |           |       |                |
|--------------------------|-----------|-------|----------------|-----------|-------|----------------|-----------|-------|----------------|-----------|-------|----------------|-----------|-------|----------------|
| Spain                    | 2000-2004 | -2.59 | -3.17 to -2.02 | 2004-2014 | -1.43 | -1.60 to -1.26 | 2014-2019 | -0.34 | -0.74 to 0.07  |           |       |                | 2000-2019 | -1.39 | -1.56 to -1.22 |
| Sweden                   | 2000-2004 | 0.00  | -0.56 to 0.56  | 2004-2009 | -1.38 | -1.92 to -0.84 | 2009-2013 | -0.45 | -1.30 to 0.40  | 2013-2019 | -1.97 | -2.26 to -1.68 | 2000-2019 | -1.08 | -1.32 to -0.85 |
| Switzerland              | 2000-2005 | -2.91 | -3.34 to -2.47 | 2005-2012 | -1.35 | -1.68 to -1.01 | 2012-2015 | -2.90 | -4.83 to -0.92 | 2015-2019 | -0.50 | -1.13 to 0.13  | 2000-2019 | -1.83 | -2.16 to -1.50 |
| Trinidad and Tobago      | 2000-2008 | 0.25  | -0.33 to 0.85  | 2008-2019 | -0.83 | -1.15 to -0.51 |           |       |                |           |       |                | 2000-2019 | -0.38 | -0.66 to -0.09 |
| United Kingdom           | 2000-2010 | -2.54 | -2.65 to -2.43 | 2010-2014 | -1.65 | -2.38 to -0.92 | 2014-2019 | 0.00  | -0.33 to 0.33  |           |       |                | 2000-2019 | -1.69 | -1.86 to -1.53 |
| United States of America | 2000-2007 | -2.16 | -2.35 to -1.96 | 2007-2013 | -1.58 | -1.90 to -1.26 | 2013-2019 | -0.31 | -0.55 to -0.08 |           |       |                | 2000-2019 | -1.40 | -1.52 to -1.27 |
| Uruguay                  | 2000-2005 | -0.67 | -1.21 to -0.12 | 2005-2012 | -1.73 | -2.14 to -1.32 | 2012-2019 | -0.48 | -0.81 to -0.15 |           |       |                | 2000-2019 | -0.99 | -1.21 to -0.78 |

---

**Supplementary Table 4. Joinpoint analysis for breast cancer, age-standardized incidence in 2000-2019 for female, younger than 40 years**

| Country             | Trend 1   |       |                | Trend 2   |       |                | Trend 3   |      |              | Trend 4   |       |                | Year      | AAPC  | Range          |
|---------------------|-----------|-------|----------------|-----------|-------|----------------|-----------|------|--------------|-----------|-------|----------------|-----------|-------|----------------|
|                     | Year      | EAPC  | range          | Year      | EAPC  | range          | Year      | EAPC | range        | Year      | EAPC  | range          |           |       |                |
| Antigua and Barbuda | 2000-2003 | -3.71 | -4.12 to -3.30 | 2003-2006 | 6.86  | 6.01 to 7.72   | 2006-2019 | 0.39 | 0.35 to 0.43 |           |       |                | 2000-2019 | 0.72  | 0.59 to 0.85   |
| Argentina           | 2000-2004 | -1.34 | -2.90 to 0.23  | 2004-2015 | 0.07  | -0.30 to 0.44  | 2015-2019 | 2.11 | 0.74 to 3.50 |           |       |                | 2000-2019 | 0.19  | -0.25 to 0.64  |
| Australia           | 2000-2019 | -0.84 | -1.00 to -0.68 |           |       |                |           |      |              |           |       |                | 2000-2019 | -0.84 | -1.00 to -0.68 |
| Austria             | 2000-2004 | -3.36 | -6.21 to -0.43 | 2004-2019 | -0.05 | -0.48 to 0.39  |           |      |              |           |       |                | 2000-2019 | -0.76 | -1.41 to -0.10 |
| Barbados            | 2000-2003 | 4.77  | 1.62 to 8.02   | 2003-2006 | -2.79 | -8.45 to 3.21  | 2006-2010 | 5.03 | 2.02 to 8.13 | 2010-2019 | -1.04 | -1.55 to -0.52 | 2000-2019 | 0.83  | -0.26 to 1.93  |
| Belgium             | 2000-2007 | -0.09 | -1.04 to 0.86  | 2007-2019 | -1.73 | -2.18 to -1.28 |           |      |              |           |       |                | 2000-2019 | -1.13 | -1.54 to -0.72 |
| Brazil              | 2000-2016 | 0.84  | 0.73 to 0.94   | 2016-2019 | -1.86 | -3.04 to -0.65 |           |      |              |           |       |                | 2000-2019 | 0.41  | 0.21 to 0.60   |
| Canada              | 2000-2009 | -0.17 | -0.67 to 0.33  | 2009-2012 | -2.91 | -8.46 to 2.97  | 2012-2019 | 0.91 | 0.12 to 1.70 |           |       |                | 2000-2019 | -0.21 | -1.11 to 0.69  |
| Chile               | 2000-2015 | 2.61  | 2.31 to 2.91   | 2015-2019 | -1.26 | -3.18 to 0.70  |           |      |              |           |       |                | 2000-2019 | 1.78  | 1.34 to 2.23   |
| China               | 2000-2004 | -1.11 | -2.60 to 0.40  | 2004-2010 | 3.21  | 2.23 to 4.19   | 2010-2016 | 1.75 | 0.85 to 2.67 | 2016-2019 | 4.67  | 2.64 to 6.73   | 2000-2019 | 2.05  | 1.52 to 2.59   |
| Colombia            | 2000-2007 | 1.44  | 0.64 to 2.24   | 2007-2010 | 5.42  | 0.00 to 11.13  | 2010-2016 | 2.46 | 1.33 to 3.59 | 2016-2019 | 0.01  | -2.27 to 2.35  | 2000-2019 | 2.15  | 1.25 to 3.05   |
| Costa Rica          | 2000-2019 | 1.79  | 1.36 to 2.22   |           |       |                |           |      |              |           |       |                | 2000-2019 | 1.79  | 1.36 to 2.22   |
| Croatia             | 2000-2014 | 1.57  | 1.04 to 2.11   | 2014-2019 | -3.63 | -6.09 to -1.11 |           |      |              |           |       |                | 2000-2019 | 0.18  | -0.54 to 0.90  |
| Cuba                | 2000-2011 | -0.58 | -0.99 to -0.18 | 2011-2019 | 1.57  | 0.85 to 2.30   |           |      |              |           |       |                | 2000-2019 | 0.32  | -0.03 to 0.67  |
| Denmark             | 2000-2019 | -0.98 | -1.29 to -0.66 |           |       |                |           |      |              |           |       |                | 2000-2019 | -0.98 | -1.29 to -0.66 |

|            |           |       |                |           |       |                |           |       |                |           |      |               |           |       |                |
|------------|-----------|-------|----------------|-----------|-------|----------------|-----------|-------|----------------|-----------|------|---------------|-----------|-------|----------------|
| Ecuador    | 2000-2003 | 9.01  | 3.72 to 14.57  | 2003-2019 | 1.61  | 1.31 to 1.91   |           |       |                |           |      |               | 2000-2019 | 2.74  | 1.96 to 3.52   |
| Estonia    | 2000-2006 | -2.55 | -4.00 to -1.08 | 2006-2019 | 1.00  | 0.51 to 1.50   |           |       |                |           |      |               | 2000-2019 | -0.14 | -0.67 to 0.40  |
| Fiji       | 2000-2005 | 1.25  | -0.57 to 3.11  | 2005-2008 | 6.99  | -0.72 to 15.29 | 2008-2019 | 1.49  | 1.03 to 1.95   |           |      |               | 2000-2019 | 2.28  | 1.09 to 3.48   |
| Finland    | 2000-2019 | -1.00 | -1.34 to -0.66 |           |       |                |           |       |                |           |      |               | 2000-2019 | -1.00 | -1.34 to -0.66 |
| France     | 2000-2009 | 0.63  | 0.05 to 1.22   | 2009-2019 | -1.58 | -2.08 to -1.07 |           |       |                |           |      |               | 2000-2019 | -0.54 | -0.89 to -0.18 |
| Germany    | 2000-2007 | -0.60 | -1.03 to -0.16 | 2007-2010 | 2.02  | -1.38 to 5.53  | 2010-2019 | -0.21 | -0.54 to 0.11  |           |      |               | 2000-2019 | -0.01 | -0.53 to 0.51  |
| Greece     | 2000-2004 | 3.01  | 0.23 to 5.86   | 2004-2019 | 0.01  | -0.35 to 0.37  |           |       |                |           |      |               | 2000-2019 | 0.63  | 0.04 to 1.23   |
| Grenada    | 2000-2002 | 10.33 | 9.58 to 11.09  | 2002-2007 | -1.40 | -1.59 to -1.21 | 2007-2010 | 6.06  | 5.44 to 6.69   | 2010-2019 | 0.50 | 0.45 to 0.55  | 2000-2019 | 1.85  | 1.73 to 1.96   |
| Guatemala  | 2000-2019 | 1.22  | 0.85 to 1.59   |           |       |                |           |       |                |           |      |               | 2000-2019 | 1.22  | 0.85 to 1.59   |
| Guyana     | 2000-2003 | -4.23 | -9.55 to 1.42  | 2003-2019 | 0.31  | -0.15 to 0.77  |           |       |                |           |      |               | 2000-2019 | -0.42 | -1.32 to 0.48  |
| Hungary    | 2000-2007 | -1.03 | -1.83 to -0.21 | 2007-2010 | -4.31 | -10.25 to 2.02 | 2010-2019 | 0.98  | 0.40 to 1.56   |           |      |               | 2000-2019 | -0.61 | -1.58 to 0.37  |
| Iceland    | 2000-2004 | -0.65 | -1.61 to 0.32  | 2004-2007 | -3.64 | -6.65 to -0.53 | 2007-2019 | -1.02 | -1.21 to -0.82 |           |      |               | 2000-2019 | -1.36 | -1.85 to -0.86 |
| Israel     | 2000-2014 | -0.76 | -1.23 to -0.29 | 2014-2017 | 4.49  | -4.45 to 14.28 | 2017-2019 | -4.35 | -12.40 to 4.44 |           |      |               | 2000-2019 | -0.34 | -1.87 to 1.22  |
| Italy      | 2000-2003 | 0.46  | -1.12 to 2.07  | 2003-2008 | -2.22 | -3.19 to -1.23 | 2008-2019 | -1.01 | -1.23 to -0.78 |           |      |               | 2000-2019 | -1.10 | -1.44 to -0.75 |
| Japan      | 2000-2009 | 1.23  | 0.86 to 1.61   | 2009-2019 | -1.39 | -1.70 to -1.08 |           |       |                |           |      |               | 2000-2019 | -0.16 | -0.38 to 0.07  |
| Kuwait     | 2000-2016 | -2.46 | -3.03 to -1.89 | 2016-2019 | 2.96  | -2.63 to 8.87  |           |       |                |           |      |               | 2000-2019 | -1.63 | -2.54 to -0.71 |
| Kyrgyzstan | 2000-2012 | -0.29 | -0.61 to 0.03  | 2012-2016 | -2.75 | -5.31 to -0.11 | 2016-2019 | 1.48  | -1.16 to 4.19  |           |      |               | 2000-2019 | -0.54 | -1.19 to 0.11  |
| Latvia     | 2000-2003 | -1.54 | -6.47 to 3.65  | 2003-2006 | 6.44  | -3.98 to 17.98 | 2006-2011 | -3.24 | -6.44 to 0.06  | 2011-2019 | 0.74 | -0.53 to 2.03 | 2000-2019 | 0.18  | -1.62 to 2.01  |
| Lithuania  | 2000-2007 | 2.49  | 0.57 to 4.44   | 2007-2019 | -0.21 | -1.12 to 0.71  |           |       |                |           |      |               | 2000-2019 | 0.78  | -0.06 to 1.62  |

|                     |           |       |                |           |       |                |           |       |                |           |       |                |           |       |                |
|---------------------|-----------|-------|----------------|-----------|-------|----------------|-----------|-------|----------------|-----------|-------|----------------|-----------|-------|----------------|
| Luxembourg          | 2000-2005 | -1.31 | -2.12 to -0.50 | 2005-2010 | 0.52  | -0.62 to 1.67  | 2010-2019 | -2.53 | -2.85 to -2.21 |           |       |                | 2000-2019 | -1.41 | -1.77 to -1.06 |
| Malta               | 2000-2005 | 3.52  | 1.07 to 6.04   | 2005-2019 | 0.41  | -0.06 to 0.89  |           |       |                |           |       |                | 2000-2019 | 1.22  | 0.55 to 1.90   |
| Mauritius           | 2000-2019 | 2.21  | 1.91 to 2.52   |           |       |                |           |       |                |           |       |                | 2000-2019 | 2.21  | 1.91 to 2.52   |
| Mexico              | 2000-2012 | 0.13  | -0.30 to 0.55  | 2012-2019 | 2.20  | 1.35 to 3.05   |           |       |                |           |       |                | 2000-2019 | 0.88  | 0.51 to 1.26   |
| Netherlands         | 2000-2011 | -0.68 | -1.04 to -0.33 | 2011-2014 | -3.64 | -9.02 to 2.05  | 2014-2019 | 1.65  | 0.29 to 3.02   |           |       |                | 2000-2019 | -0.55 | -1.44 to 0.34  |
| New Zealand         | 2000-2019 | 0.30  | 0.05 to 0.54   |           |       |                |           |       |                |           |       |                | 2000-2019 | 0.30  | 0.05 to 0.54   |
| Norway              | 2000-2010 | -0.44 | -1.00 to 0.13  | 2010-2019 | -2.98 | -3.66 to -2.29 |           |       |                |           |       |                | 2000-2019 | -1.65 | -2.05 to -1.24 |
| Panama              | 2000-2006 | -1.03 | -2.02 to -0.04 | 2006-2017 | 3.40  | 3.00 to 3.81   | 2017-2019 | -1.30 | -5.54 to 3.13  |           |       |                | 2000-2019 | 1.48  | 0.93 to 2.03   |
| Philippines         | 2000-2007 | 0.16  | -0.31 to 0.64  | 2007-2010 | 2.57  | -0.70 to 5.94  | 2010-2013 | 4.51  | 1.43 to 7.68   | 2013-2019 | 1.14  | 0.68 to 1.61   | 2000-2019 | 1.53  | 0.88 to 2.17   |
| Poland              | 2000-2003 | -1.11 | -2.57 to 0.36  | 2003-2009 | 1.10  | 0.40 to 1.80   | 2009-2019 | 0.32  | 0.10 to 0.55   |           |       |                | 2000-2019 | 0.34  | 0.03 to 0.65   |
| Puerto Rico         | 2000-2019 | 1.26  | 0.88 to 1.64   |           |       |                |           |       |                |           |       |                | 2000-2019 | 1.26  | 0.88 to 1.64   |
| Republic of Korea   | 2000-2009 | 4.88  | 4.39 to 5.37   | 2009-2019 | -0.21 | -0.57 to 0.15  |           |       |                |           |       |                | 2000-2019 | 2.17  | 1.89 to 2.44   |
| Republic of Moldova | 2000-2013 | -0.73 | -1.14 to -0.32 | 2013-2016 | 2.96  | -4.96 to 11.53 | 2016-2019 | -6.11 | -9.99 to -2.06 |           |       |                | 2000-2019 | -1.03 | -2.32 to 0.27  |
| Romania             | 2000-2008 | -0.54 | -1.36 to 0.28  | 2008-2019 | 1.82  | 1.33 to 2.32   |           |       |                |           |       |                | 2000-2019 | 0.82  | 0.41 to 1.23   |
| Saint Lucia         | 2000-2006 | -2.65 | -5.31 to 0.08  | 2006-2012 | 8.51  | 5.20 to 11.93  | 2012-2017 | -4.62 | -8.40 to -0.69 | 2017-2019 | 5.01  | -8.12 to 20.02 | 2000-2019 | 1.00  | -0.90 to 2.95  |
| Serbia              | 2000-2006 | -2.26 | -3.17 to -1.33 | 2006-2019 | 1.30  | 0.99 to 1.60   |           |       |                |           |       |                | 2000-2019 | 0.16  | -0.17 to 0.50  |
| Singapore           | 2000-2012 | 0.96  | 0.19 to 1.73   | 2012-2019 | -4.12 | -5.71 to -2.52 |           |       |                |           |       |                | 2000-2019 | -0.94 | -1.65 to -0.23 |
| Slovakia            | 2000-2003 | -2.75 | -5.75 to 0.36  | 2003-2019 | 0.55  | 0.31 to 0.79   |           |       |                |           |       |                | 2000-2019 | 0.02  | -0.47 to 0.52  |
| Slovenia            | 2000-2004 | -0.24 | -2.05 to 1.60  | 2004-2007 | -5.21 | -10.82 to 0.75 | 2007-2010 | 4.11  | -2.05 to 10.66 | 2010-2019 | -0.67 | -1.23 to -0.12 | 2000-2019 | -0.58 | -1.81 to 0.67  |

|                          |           |       |                |           |       |                |           |       |                |           |      |               |           |       |                |
|--------------------------|-----------|-------|----------------|-----------|-------|----------------|-----------|-------|----------------|-----------|------|---------------|-----------|-------|----------------|
| Spain                    | 2000-2005 | -1.13 | -2.13 to -0.11 | 2005-2009 | 0.98  | -1.19 to 3.19  | 2009-2017 | -1.74 | -2.32 to -1.16 | 2017-2019 | 2.79 | -1.87 to 7.68 | 2000-2019 | -0.54 | -1.20 to 0.12  |
| Sweden                   | 2000-2019 | -0.52 | -0.79 to -0.24 |           |       |                |           |       |                |           |      |               | 2000-2019 | -0.52 | -0.79 to -0.24 |
| Switzerland              | 2000-2011 | -1.16 | -1.63 to -0.69 | 2011-2015 | -4.78 | -8.35 to -1.06 | 2015-2019 | 1.27  | -1.21 to 3.82  |           |      |               | 2000-2019 | -1.43 | -2.31 to -0.54 |
| Trinidad and Tobago      | 2000-2008 | 1.45  | 0.26 to 2.66   | 2008-2019 | -1.17 | -1.88 to -0.45 |           |       |                |           |      |               | 2000-2019 | -0.07 | -0.67 to 0.53  |
| United Kingdom           | 2000-2012 | -0.61 | -0.93 to -0.28 | 2012-2019 | 0.82  | 0.05 to 1.59   |           |       |                |           |      |               | 2000-2019 | -0.09 | -0.41 to 0.24  |
| United States of America | 2000-2013 | -1.64 | -1.88 to -1.39 | 2013-2017 | 1.96  | -0.57 to 4.55  | 2017-2019 | -2.68 | -7.44 to 2.33  |           |      |               | 2000-2019 | -1.00 | -1.68 to -0.32 |
| Uruguay                  | 2000-2019 | -0.31 | -0.46 to -0.16 |           |       |                |           |       |                |           |      |               | 2000-2019 | -0.31 | -0.46 to -0.16 |

---

**Supplementary Table 5. Joinpoint analysis for breast cancer, age-standardized mortality in 2000-2019 for female, younger than 40 years**

| Country             | Trend 1   |       |                | Trend 2   |       |                | Trend 3   |       |                | Trend 4   |       |                | Year      | AAPC  | Range          |
|---------------------|-----------|-------|----------------|-----------|-------|----------------|-----------|-------|----------------|-----------|-------|----------------|-----------|-------|----------------|
|                     | Year      | EAPC  | range          |           |       |                |
| Antigua and Barbuda | 2000-2004 | -1.50 | -2.09 to -0.91 | 2004-2011 | 0.08  | -0.23 to 0.40  | 2011-2019 | 0.71  | 0.51 to 0.92   |           |       |                | 2000-2019 | 0.01  | -0.16 to 0.18  |
| Argentina           | 2000-2005 | -2.43 | -3.22 to -1.65 | 2005-2015 | -0.96 | -1.29 to -0.64 | 2015-2019 | 0.52  | -0.54 to 1.59  |           |       |                | 2000-2019 | -1.04 | -1.36 to -0.73 |
| Australia           | 2000-2005 | -3.49 | -4.21 to -2.77 | 2005-2014 | -2.01 | -2.39 to -1.62 | 2014-2017 | 0.47  | -3.13 to 4.20  | 2017-2019 | -2.49 | -6.03 to 1.17  | 2000-2019 | -2.07 | -2.70 to -1.43 |
| Austria             | 2000-2005 | -4.37 | -5.86 to -2.85 | 2005-2019 | -1.12 | -1.49 to -0.75 |           |       |                |           |       |                | 2000-2019 | -1.98 | -2.43 to -1.53 |
| Barbados            | 2000-2003 | 2.05  | 0.81 to 3.30   | 2003-2006 | -2.63 | -4.98 to -0.21 | 2006-2010 | 2.03  | 0.79 to 3.29   | 2010-2019 | -0.83 | -1.05 to -0.61 | 2000-2019 | -0.07 | -0.52 to 0.38  |
| Belgium             | 2000-2019 | -2.64 | -2.84 to -2.43 |           |       |                |           |       |                |           |       |                | 2000-2019 | -2.64 | -2.84 to -2.43 |
| Brazil              | 2000-2005 | -1.19 | -1.59 to -0.78 | 2005-2008 | 0.43  | -1.35 to 2.25  | 2008-2016 | -0.54 | -0.77 to -0.31 | 2016-2019 | -2.54 | -3.37 to -1.71 | 2000-2019 | -0.88 | -1.17 to -0.58 |
| Canada              | 2000-2009 | -1.36 | -1.74 to -0.97 | 2009-2012 | -3.84 | -8.29 to 0.82  | 2012-2019 | -0.03 | -0.68 to 0.62  |           |       |                | 2000-2019 | -1.27 | -1.98 to -0.55 |
| Chile               | 2000-2007 | -0.56 | -1.23 to 0.12  | 2007-2015 | 0.88  | 0.21 to 1.56   | 2015-2019 | -2.25 | -3.79 to -0.69 |           |       |                | 2000-2019 | -0.32 | -0.77 to 0.14  |
| China               | 2000-2004 | -5.00 | -6.35 to -3.63 | 2004-2013 | -1.88 | -2.37 to -1.38 | 2013-2019 | 0.54  | -0.31 to 1.39  |           |       |                | 2000-2019 | -1.79 | -2.20 to -1.38 |
| Colombia            | 2000-2016 | 0.94  | 0.66 to 1.21   | 2016-2019 | -1.54 | -4.74 to 1.76  |           |       |                |           |       |                | 2000-2019 | 0.54  | 0.02 to 1.07   |
| Costa Rica          | 2000-2019 | 0.53  | 0.11 to 0.95   |           |       |                |           |       |                |           |       |                | 2000-2019 | 0.53  | 0.11 to 0.95   |
| Croatia             | 2000-2014 | -0.39 | -0.90 to 0.12  | 2014-2019 | -4.73 | -7.30 to -2.08 |           |       |                |           |       |                | 2000-2019 | -1.55 | -2.28 to -0.81 |
| Cuba                | 2000-2011 | -1.88 | -2.32 to -1.45 | 2011-2019 | 0.69  | -0.14 to 1.53  |           |       |                |           |       |                | 2000-2019 | -0.81 | -1.20 to -0.41 |
| Denmark             | 2000-2016 | -3.47 | -3.76 to -3.17 | 2016-2019 | 0.75  | -3.92 to 5.64  |           |       |                |           |       |                | 2000-2019 | -2.81 | -3.52 to -2.10 |

|            |           |       |                |           |       |                |           |       |                |           |       |                |           |       |                |
|------------|-----------|-------|----------------|-----------|-------|----------------|-----------|-------|----------------|-----------|-------|----------------|-----------|-------|----------------|
| Ecuador    | 2000-2003 | 6.32  | 1.77 to 11.08  | 2003-2019 | 0.22  | -0.06 to 0.51  |           |       |                |           |       |                | 2000-2019 | 1.16  | 0.49 to 1.84   |
| Estonia    | 2000-2008 | -5.99 | -6.82 to -5.16 | 2008-2019 | -0.53 | -1.19 to 0.14  |           |       |                |           |       |                | 2000-2019 | -2.87 | -3.34 to -2.39 |
| Fiji       | 2000-2004 | 0.36  | -0.62 to 1.34  | 2004-2008 | 5.73  | 4.22 to 7.27   | 2008-2019 | 0.68  | 0.50 to 0.86   |           |       |                | 2000-2019 | 1.65  | 1.31 to 2.00   |
| Finland    | 2000-2013 | -2.79 | -3.15 to -2.43 | 2013-2016 | -6.05 | -13.76 to 2.34 | 2016-2019 | 1.81  | -2.47 to 6.27  |           |       |                | 2000-2019 | -2.60 | -3.94 to -1.25 |
| France     | 2000-2006 | -2.37 | -3.04 to -1.70 | 2006-2009 | -0.94 | -5.09 to 3.39  | 2009-2017 | -3.00 | -3.60 to -2.40 | 2017-2019 | 1.47  | -3.44 to 6.63  | 2000-2019 | -2.02 | -2.79 to -1.23 |
| Germany    | 2000-2006 | -3.37 | -3.81 to -2.92 | 2006-2019 | -0.50 | -0.67 to -0.34 |           |       |                |           |       |                | 2000-2019 | -1.42 | -1.59 to -1.25 |
| Greece     | 2000-2019 | -0.45 | -0.63 to -0.28 |           |       |                |           |       |                |           |       |                | 2000-2019 | -0.45 | -0.63 to -0.28 |
| Grenada    | 2000-2009 | 0.47  | 0.24 to 0.69   | 2009-2017 | 1.12  | 0.81 to 1.43   | 2017-2019 | -3.27 | -5.50 to -0.99 |           |       |                | 2000-2019 | 0.34  | 0.07 to 0.61   |
| Guatemala  | 2000-2019 | 0.19  | -0.15 to 0.53  |           |       |                |           |       |                |           |       |                | 2000-2019 | 0.19  | -0.15 to 0.53  |
| Guyana     | 2000-2003 | -4.70 | -7.42 to -1.90 | 2003-2008 | 2.00  | 0.11 to 3.92   | 2008-2011 | -3.85 | -9.44 to 2.09  | 2011-2019 | 0.21  | -0.47 to 0.89  | 2000-2019 | -0.77 | -1.79 to 0.27  |
| Hungary    | 2000-2012 | -3.01 | -3.37 to -2.64 | 2012-2019 | -0.02 | -0.94 to 0.91  |           |       |                |           |       |                | 2000-2019 | -1.92 | -2.29 to -1.54 |
| Iceland    | 2000-2009 | -3.63 | -3.78 to -3.47 | 2009-2019 | -0.55 | -0.70 to -0.40 |           |       |                |           |       |                | 2000-2019 | -2.02 | -2.12 to -1.92 |
| Israel     | 2000-2013 | -2.85 | -3.21 to -2.48 | 2013-2017 | 2.51  | -0.98 to 6.13  | 2017-2019 | -4.41 | -10.75 to 2.38 |           |       |                | 2000-2019 | -1.91 | -2.84 to -0.97 |
| Italy      | 2000-2008 | -3.34 | -3.57 to -3.10 | 2008-2016 | -1.65 | -1.98 to -1.33 | 2016-2019 | -0.34 | -1.68 to 1.02  |           |       |                | 2000-2019 | -2.16 | -2.40 to -1.92 |
| Japan      | 2000-2002 | -2.53 | -4.46 to -0.55 | 2002-2011 | -1.21 | -1.43 to -0.99 | 2011-2014 | -2.88 | -4.90 to -0.82 | 2014-2019 | -1.23 | -1.73 to -0.73 | 2000-2019 | -1.62 | -1.99 to -1.25 |
| Kuwait     | 2000-2016 | -4.88 | -5.42 to -4.33 | 2016-2019 | 1.58  | -4.42 to 7.97  |           |       |                |           |       |                | 2000-2019 | -3.88 | -4.83 to -2.93 |
| Kyrgyzstan | 2000-2007 | -1.46 | -2.33 to -0.57 | 2007-2019 | -2.97 | -3.38 to -2.55 |           |       |                |           |       |                | 2000-2019 | -2.41 | -2.79 to -2.03 |
| Latvia     | 2000-2003 | -3.45 | -8.37 to 1.75  | 2003-2006 | 3.92  | -6.76 to 15.82 | 2006-2011 | -4.79 | -8.24 to -1.21 | 2011-2019 | -1.32 | -2.78 to 0.16  | 2000-2019 | -1.78 | -3.65 to 0.13  |
| Lithuania  | 2000-2007 | 1.71  | -0.15 to 3.60  | 2007-2019 | -1.56 | -2.49 to -0.62 |           |       |                |           |       |                | 2000-2019 | -0.37 | -1.20 to 0.46  |



|                     |           |       |                |           |       |                |           |       |                 |           |       |                |           |       |                |
|---------------------|-----------|-------|----------------|-----------|-------|----------------|-----------|-------|-----------------|-----------|-------|----------------|-----------|-------|----------------|
| Luxembourg          | 2000-2004 | -3.80 | -4.37 to -3.24 | 2004-2014 | -2.01 | -2.18 to -1.83 | 2014-2017 | -3.37 | -5.30 to -1.40  | 2017-2019 | -0.74 | -2.72 to 1.28  | 2000-2019 | -2.47 | -2.82 to -2.12 |
| Malta               | 2000-2002 | -1.99 | -3.89 to -0.05 | 2002-2005 | 2.53  | 0.51 to 4.59   | 2005-2014 | -1.61 | -1.82 to -1.39  | 2014-2019 | -0.68 | -1.13 to -0.22 | 2000-2019 | -0.76 | -1.11 to -0.41 |
| Mauritius           | 2000-2008 | 2.63  | 1.46 to 3.81   | 2008-2019 | 0.49  | -0.18 to 1.17  |           |       |                 |           |       |                | 2000-2019 | 1.38  | 0.81 to 1.96   |
| Mexico              | 2000-2011 | -0.95 | -1.41 to -0.50 | 2011-2019 | 0.97  | 0.28 to 1.67   |           |       |                 |           |       |                | 2000-2019 | -0.15 | -0.51 to 0.22  |
| Netherlands         | 2000-2014 | -3.14 | -3.38 to -2.89 | 2014-2019 | 0.28  | -1.15 to 1.73  |           |       |                 |           |       |                | 2000-2019 | -2.25 | -2.63 to -1.87 |
| New Zealand         | 2000-2005 | -2.44 | -3.51 to -1.35 | 2005-2010 | -0.24 | -1.85 to 1.38  | 2010-2014 | -3.66 | -6.22 to -1.04  | 2014-2019 | 0.02  | -1.26 to 1.32  | 2000-2019 | -1.48 | -2.19 to -0.76 |
| Norway              | 2000-2017 | -3.63 | -3.79 to -3.48 | 2017-2019 | -0.57 | -5.81 to 4.97  |           |       |                 |           |       |                | 2000-2019 | -3.32 | -3.84 to -2.79 |
| Panama              | 2000-2006 | -0.90 | -2.02 to 0.25  | 2006-2013 | 2.56  | 1.51 to 3.62   | 2013-2019 | -0.68 | -1.63 to 0.27   |           |       |                | 2000-2019 | 0.43  | -0.11 to 0.98  |
| Philippines         | 2000-2006 | -0.31 | -0.63 to 0.01  | 2006-2010 | 1.33  | 0.44 to 2.23   | 2010-2015 | 2.45  | 1.93 to 2.98    | 2015-2019 | 0.18  | -0.30 to 0.65  | 2000-2019 | 0.86  | 0.62 to 1.09   |
| Poland              | 2000-2002 | -3.80 | -6.63 to -0.87 | 2002-2014 | -1.78 | -2.00 to -1.55 | 2014-2019 | -0.84 | -1.60 to -0.08  |           |       |                | 2000-2019 | -1.75 | -2.10 to -1.39 |
| Puerto Rico         | 2000-2019 | -0.18 | -0.55 to 0.18  |           |       |                |           |       |                 |           |       |                | 2000-2019 | -0.18 | -0.55 to 0.18  |
| Republic of Korea   | 2000-2006 | -0.14 | -0.63 to 0.36  | 2006-2009 | 1.69  | -1.24 to 4.71  | 2009-2016 | -2.07 | -2.56 to -1.57  | 2016-2019 | -0.94 | -2.52 to 0.68  | 2000-2019 | -0.69 | -1.19 to -0.19 |
| Republic of Moldova | 2000-2019 | -2.13 | -2.46 to -1.79 |           |       |                |           |       |                 |           |       |                | 2000-2019 | -2.13 | -2.46 to -1.79 |
| Romania             | 2000-2011 | -1.89 | -2.30 to -1.48 | 2011-2019 | 0.70  | -0.02 to 1.43  |           |       |                 |           |       |                | 2000-2019 | -0.81 | -1.16 to -0.45 |
| Saint Lucia         | 2000-2003 | -3.35 | -5.04 to -1.62 | 2003-2006 | -1.02 | -4.43 to 2.51  | 2006-2012 | 2.73  | 1.99 to 3.48    | 2012-2019 | -1.61 | -2.03 to -1.20 | 2000-2019 | -0.45 | -1.03 to 0.14  |
| Serbia              | 2000-2007 | -4.50 | -4.88 to -4.11 | 2007-2013 | -1.25 | -2.02 to -0.48 | 2013-2019 | 0.10  | -0.49 to 0.70   |           |       |                | 2000-2019 | -2.04 | -2.34 to -1.74 |
| Singapore           | 2000-2003 | -4.41 | -7.37 to -1.35 | 2003-2013 | -1.52 | -2.11 to -0.92 | 2013-2017 | -7.98 | -11.18 to -4.66 | 2017-2019 | 1.41  | -5.45 to 8.78  | 2000-2019 | -3.07 | -4.08 to -2.06 |
| Slovakia            | 2000-2003 | -4.47 | -6.98 to -1.89 | 2003-2014 | -1.55 | -1.99 to -1.10 | 2014-2019 | -0.15 | -1.45 to 1.17   |           |       |                | 2000-2019 | -1.65 | -2.18 to -1.11 |
| Slovenia            | 2000-2007 | -4.50 | -5.90 to -3.08 | 2007-2019 | -1.74 | -2.48 to -0.98 |           |       |                 |           |       |                | 2000-2019 | -2.76 | -3.41 to -2.11 |

|                          |           |       |                |           |       |                 |           |       |                |           |       |               |           |       |                |
|--------------------------|-----------|-------|----------------|-----------|-------|-----------------|-----------|-------|----------------|-----------|-------|---------------|-----------|-------|----------------|
| Spain                    | 2000-2004 | -4.07 | -4.64 to -3.50 | 2004-2011 | -1.45 | -1.77 to -1.14  | 2011-2016 | -3.18 | -3.79 to -2.57 | 2016-2019 | 1.39  | 0.32 to 2.47  | 2000-2019 | -2.03 | -2.27 to -1.78 |
| Sweden                   | 2000-2019 | -1.57 | -1.80 to -1.34 |           |       |                 |           |       |                |           |       |               | 2000-2019 | -1.57 | -1.80 to -1.34 |
| Switzerland              | 2000-2012 | -2.57 | -2.84 to -2.30 | 2012-2015 | -5.35 | -10.21 to -0.22 | 2015-2019 | 0.56  | -1.15 to 2.30  |           |       |               | 2000-2019 | -2.37 | -3.17 to -1.55 |
| Trinidad and Tobago      | 2000-2019 | -1.45 | -1.74 to -1.15 |           |       |                 |           |       |                |           |       |               | 2000-2019 | -1.45 | -1.74 to -1.15 |
| United Kingdom           | 2000-2005 | -3.62 | -4.11 to -3.12 | 2005-2008 | -1.45 | -3.80 to 0.95   | 2008-2012 | -2.80 | -4.03 to -1.56 | 2012-2019 | -0.11 | -0.46 to 0.25 | 2000-2019 | -1.82 | -2.25 to -1.39 |
| United States of America | 2000-2012 | -2.64 | -2.81 to -2.47 | 2012-2017 | 1.32  | 0.29 to 2.37    | 2017-2019 | -2.21 | -5.30 to 0.98  |           |       |               | 2000-2019 | -1.56 | -1.96 to -1.17 |
| Uruguay                  | 2000-2019 | -1.39 | -1.52 to -1.27 |           |       |                 |           |       |                |           |       |               | 2000-2019 | -1.39 | -1.52 to -1.27 |

---

**Supplementary Table 6. Joinpoint analysis for breast cancer, age-standardized incidence in 2000-2019 for female, 40 years or older**

| Country             | Trend 1   |       |                | Trend 2   |       |                | Trend 3   |       |                | Trend 4   |       |                | Year      | AAPC  | Range          |
|---------------------|-----------|-------|----------------|-----------|-------|----------------|-----------|-------|----------------|-----------|-------|----------------|-----------|-------|----------------|
|                     | Year      | EAPC  | range          |           |       |                |
| Antigua and Barbuda | 2000-2019 | 1.93  | 1.65 to 2.22   |           |       |                |           |       |                |           |       |                | 2000-2019 | 1.93  | 1.65 to 2.22   |
| Argentina           | 2000-2003 | 1.37  | -0.72 to 3.50  | 2003-2014 | -0.58 | -0.88 to -0.27 | 2014-2019 | 1.13  | 0.30 to 1.96   |           |       |                | 2000-2019 | 0.17  | -0.21 to 0.56  |
| Australia           | 2000-2019 | -1.08 | -1.19 to -0.96 |           |       |                |           |       |                |           |       |                | 2000-2019 | -1.08 | -1.19 to -0.96 |
| Austria             | 2000-2019 | -0.86 | -1.00 to -0.73 |           |       |                |           |       |                |           |       |                | 2000-2019 | -0.86 | -1.00 to -0.73 |
| Barbados            | 2000-2004 | 2.32  | 1.40 to 3.24   | 2004-2007 | 0.21  | -2.36 to 2.85  | 2007-2011 | 3.47  | 2.25 to 4.69   | 2011-2019 | -0.56 | -0.79 to -0.33 | 2000-2019 | 1.00  | 0.54 to 1.46   |
| Belgium             | 2000-2019 | -1.01 | -1.17 to -0.86 |           |       |                |           |       |                |           |       |                | 2000-2019 | -1.01 | -1.17 to -0.86 |
| Brazil              | 2000-2003 | 1.13  | -0.00 to 2.28  | 2003-2012 | -0.10 | -0.32 to 0.11  | 2012-2019 | -0.72 | -0.95 to -0.48 |           |       |                | 2000-2019 | -0.14 | -0.34 to 0.07  |
| Canada              | 2000-2013 | -1.18 | -1.34 to -1.02 | 2013-2019 | 0.69  | 0.20 to 1.18   |           |       |                |           |       |                | 2000-2019 | -0.59 | -0.77 to -0.42 |
| Chile               | 2000-2013 | 1.34  | 1.04 to 1.63   | 2013-2019 | -0.13 | -0.90 to 0.64  |           |       |                |           |       |                | 2000-2019 | 0.87  | 0.58 to 1.16   |
| China               | 2000-2003 | 4.80  | 2.94 to 6.70   | 2003-2010 | 3.31  | 2.78 to 3.83   | 2010-2016 | 1.33  | 0.77 to 1.89   | 2016-2019 | 3.77  | 2.66 to 4.89   | 2000-2019 | 2.98  | 2.61 to 3.36   |
| Colombia            | 2000-2006 | 0.11  | -0.65 to 0.89  | 2006-2015 | 1.80  | 1.38 to 2.21   | 2015-2019 | 0.05  | -0.96 to 1.07  |           |       |                | 2000-2019 | 0.89  | 0.55 to 1.24   |
| Costa Rica          | 2000-2019 | 1.20  | 0.86 to 1.53   |           |       |                |           |       |                |           |       |                | 2000-2019 | 1.20  | 0.86 to 1.53   |
| Croatia             | 2000-2015 | 1.40  | 1.13 to 1.67   | 2015-2019 | -3.40 | -5.27 to -1.49 |           |       |                |           |       |                | 2000-2019 | 0.37  | -0.06 to 0.80  |
| Cuba                | 2000-2008 | 1.76  | 1.19 to 2.33   | 2008-2019 | 0.42  | 0.13 to 0.71   |           |       |                |           |       |                | 2000-2019 | 0.98  | 0.71 to 1.25   |
| Denmark             | 2000-2005 | 0.52  | -0.16 to 1.20  | 2005-2009 | 1.91  | 0.47 to 3.36   | 2009-2014 | -3.97 | -4.83 to -3.12 | 2014-2019 | -0.94 | -1.59 to -0.28 | 2000-2019 | -0.78 | -1.17 to -0.39 |

|            |           |       |                |           |       |                |           |       |                |           |       |                |           |       |                |
|------------|-----------|-------|----------------|-----------|-------|----------------|-----------|-------|----------------|-----------|-------|----------------|-----------|-------|----------------|
| Ecuador    | 2000-2005 | 6.73  | 4.11 to 9.42   | 2005-2019 | 1.61  | 1.23 to 1.99   |           |       |                |           |       |                | 2000-2019 | 2.93  | 2.26 to 3.61   |
| Estonia    | 2000-2007 | 1.10  | 0.30 to 1.91   | 2007-2010 | -1.98 | -7.47 to 3.85  | 2010-2019 | 1.07  | 0.54 to 1.61   |           |       |                | 2000-2019 | 0.60  | -0.29 to 1.50  |
| Fiji       | 2000-2005 | 0.48  | -0.18 to 1.15  | 2005-2008 | 5.88  | 3.14 to 8.69   | 2008-2019 | 0.97  | 0.82 to 1.12   |           |       |                | 2000-2019 | 1.60  | 1.19 to 2.02   |
| Finland    | 2000-2010 | 1.17  | 0.68 to 1.65   | 2010-2019 | -1.57 | -2.10 to -1.03 |           |       |                |           |       |                | 2000-2019 | -0.14 | -0.47 to 0.19  |
| France     | 2000-2003 | 2.49  | 0.84 to 4.17   | 2003-2009 | -0.44 | -1.12 to 0.25  | 2009-2013 | -1.96 | -3.44 to -0.47 | 2013-2019 | -1.02 | -1.53 to -0.51 | 2000-2019 | -0.49 | -0.91 to -0.07 |
| Germany    | 2000-2009 | 0.58  | 0.29 to 0.87   | 2009-2019 | -0.98 | -1.21 to -0.75 |           |       |                |           |       |                | 2000-2019 | -0.25 | -0.41 to -0.08 |
| Greece     | 2000-2009 | 0.81  | 0.37 to 1.25   | 2009-2015 | -1.28 | -2.32 to -0.23 | 2015-2019 | 1.02  | -0.48 to 2.53  |           |       |                | 2000-2019 | 0.19  | -0.26 to 0.64  |
| Grenada    | 2000-2019 | 2.52  | 2.15 to 2.89   |           |       |                |           |       |                |           |       |                | 2000-2019 | 2.52  | 2.15 to 2.89   |
| Guatemala  | 2000-2013 | 2.55  | 2.39 to 2.71   | 2013-2019 | 0.07  | -0.31 to 0.45  |           |       |                |           |       |                | 2000-2019 | 1.76  | 1.61 to 1.91   |
| Guyana     | 2000-2006 | -1.99 | -3.00 to -0.98 | 2006-2013 | 1.99  | 1.03 to 2.97   | 2013-2019 | -0.39 | -1.23 to 0.46  |           |       |                | 2000-2019 | -0.03 | -0.53 to 0.46  |
| Hungary    | 2000-2003 | 1.84  | -0.63 to 4.37  | 2003-2009 | -3.23 | -4.31 to -2.13 | 2009-2019 | 0.08  | -0.33 to 0.49  |           |       |                | 2000-2019 | -0.70 | -1.21 to -0.19 |
| Iceland    | 2000-2004 | -0.04 | -1.03 to 0.97  | 2004-2010 | -3.67 | -4.34 to -3.00 | 2010-2019 | -1.01 | -1.29 to -0.73 |           |       |                | 2000-2019 | -1.66 | -1.95 to -1.36 |
| Israel     | 2000-2008 | -0.61 | -1.18 to -0.04 | 2008-2016 | -2.07 | -2.73 to -1.41 | 2016-2019 | 0.96  | -1.43 to 3.42  |           |       |                | 2000-2019 | -0.98 | -1.46 to -0.51 |
| Italy      | 2000-2003 | 0.99  | -0.97 to 2.99  | 2003-2019 | -0.89 | -1.04 to -0.75 |           |       |                |           |       |                | 2000-2019 | -0.60 | -0.90 to -0.29 |
| Japan      | 2000-2011 | 3.12  | 2.88 to 3.35   | 2011-2016 | 0.17  | -0.81 to 1.16  | 2016-2019 | -1.61 | -3.12 to -0.08 |           |       |                | 2000-2019 | 1.58  | 1.23 to 1.92   |
| Kuwait     | 2000-2005 | -0.42 | -2.44 to 1.64  | 2005-2008 | 5.89  | -2.24 to 14.70 | 2008-2015 | -3.46 | -4.55 to -2.35 | 2015-2019 | -0.26 | -2.06 to 1.58  | 2000-2019 | -0.56 | -1.83 to 0.73  |
| Kyrgyzstan | 2000-2019 | -0.17 | -0.29 to -0.05 |           |       |                |           |       |                |           |       |                | 2000-2019 | -0.17 | -0.29 to -0.05 |
| Latvia     | 2000-2006 | 3.68  | 2.68 to 4.69   | 2006-2019 | -0.31 | -0.59 to -0.02 |           |       |                |           |       |                | 2000-2019 | 0.93  | 0.60 to 1.27   |
| Lithuania  | 2000-2008 | 1.60  | 0.76 to 2.45   | 2008-2019 | -1.24 | -1.75 to -0.73 |           |       |                |           |       |                | 2000-2019 | -0.05 | -0.47 to 0.37  |

|                     |           |       |                |           |       |                |           |       |                |           |       |                |           |       |                |
|---------------------|-----------|-------|----------------|-----------|-------|----------------|-----------|-------|----------------|-----------|-------|----------------|-----------|-------|----------------|
| Luxembourg          | 2000-2010 | 0.31  | -0.02 to 0.64  | 2010-2014 | -2.33 | -4.25 to -0.38 | 2014-2017 | -5.04 | -8.79 to -1.13 | 2017-2019 | 0.08  | -3.84 to 4.16  | 2000-2019 | -1.14 | -1.89 to -0.37 |
| Malta               | 2000-2004 | -0.04 | -0.95 to 0.87  | 2004-2013 | -1.43 | -1.74 to -1.13 | 2013-2019 | 0.00  | -0.48 to 0.48  |           |       |                | 2000-2019 | -0.69 | -0.95 to -0.44 |
| Mauritius           | 2000-2003 | 5.47  | 2.33 to 8.70   | 2003-2007 | -0.66 | -3.27 to 2.02  | 2007-2017 | 3.12  | 2.70 to 3.54   | 2017-2019 | -0.34 | -4.11 to 3.58  | 2000-2019 | 2.31  | 1.54 to 3.08   |
| Mexico              | 2000-2019 | 1.29  | 1.18 to 1.41   |           |       |                |           |       |                |           |       |                | 2000-2019 | 1.29  | 1.18 to 1.41   |
| Netherlands         | 2000-2006 | -0.33 | -1.01 to 0.36  | 2006-2011 | 0.61  | -0.60 to 1.85  | 2011-2014 | -2.89 | -6.47 to 0.83  | 2014-2019 | 0.67  | -0.16 to 1.51  | 2000-2019 | -0.23 | -0.87 to 0.41  |
| New Zealand         | 2000-2019 | 0.05  | -0.06 to 0.16  |           |       |                |           |       |                |           |       |                | 2000-2019 | 0.05  | -0.06 to 0.16  |
| Norway              | 2000-2011 | -0.17 | -0.55 to 0.20  | 2011-2019 | -2.89 | -3.46 to -2.32 |           |       |                |           |       |                | 2000-2019 | -1.33 | -1.63 to -1.03 |
| Panama              | 2000-2007 | 1.02  | 0.41 to 1.64   | 2007-2014 | 3.01  | 2.37 to 3.65   | 2014-2019 | 0.71  | 0.01 to 1.41   |           |       |                | 2000-2019 | 1.67  | 1.33 to 2.01   |
| Philippines         | 2000-2007 | -1.84 | -2.09 to -1.60 | 2007-2010 | 1.52  | -0.20 to 3.27  | 2010-2013 | 3.93  | 2.31 to 5.57   | 2013-2019 | 1.03  | 0.79 to 1.26   | 2000-2019 | 0.48  | 0.15 to 0.82   |
| Poland              | 2000-2003 | 0.19  | -1.33 to 1.74  | 2003-2007 | 2.35  | 0.87 to 3.85   | 2007-2014 | 0.52  | 0.05 to 0.98   | 2014-2019 | -0.87 | -1.47 to -0.27 | 2000-2019 | 0.48  | 0.08 to 0.88   |
| Puerto Rico         | 2000-2019 | 0.68  | 0.41 to 0.95   |           |       |                |           |       |                |           |       |                | 2000-2019 | 0.68  | 0.41 to 0.95   |
| Republic of Korea   | 2000-2003 | 6.47  | 4.53 to 8.45   | 2003-2009 | 4.08  | 3.39 to 4.77   | 2009-2013 | 1.99  | 0.70 to 3.29   | 2013-2019 | 0.50  | 0.12 to 0.89   | 2000-2019 | 2.87  | 2.45 to 3.28   |
| Republic of Moldova | 2000-2009 | 2.25  | 1.66 to 2.84   | 2009-2012 | -3.09 | -8.62 to 2.78  | 2012-2015 | 3.90  | -2.00 to 10.15 | 2015-2019 | -3.78 | -5.52 to -2.00 | 2000-2019 | 0.35  | -0.85 to 1.57  |
| Romania             | 2000-2019 | 1.00  | 0.84 to 1.16   |           |       |                |           |       |                |           |       |                | 2000-2019 | 1.00  | 0.84 to 1.16   |
| Saint Lucia         | 2000-2008 | -0.48 | -1.68 to 0.73  | 2008-2019 | 1.78  | 1.18 to 2.39   |           |       |                |           |       |                | 2000-2019 | 0.82  | 0.25 to 1.40   |
| Serbia              | 2000-2009 | 2.09  | 1.67 to 2.51   | 2009-2019 | 0.41  | 0.08 to 0.74   |           |       |                |           |       |                | 2000-2019 | 1.20  | 0.96 to 1.45   |
| Singapore           | 2000-2012 | 1.84  | 1.50 to 2.18   | 2012-2019 | -1.45 | -2.02 to -0.87 |           |       |                |           |       |                | 2000-2019 | 0.62  | 0.34 to 0.90   |
| Slovakia            | 2000-2004 | -1.28 | -3.02 to 0.48  | 2004-2012 | 2.40  | 1.70 to 3.11   | 2012-2019 | -0.45 | -1.08 to 0.18  |           |       |                | 2000-2019 | 0.56  | 0.09 to 1.04   |
| Slovenia            | 2000-2019 | -0.93 | -1.14 to -0.73 |           |       |                |           |       |                |           |       |                | 2000-2019 | -0.93 | -1.14 to -0.73 |

|                          |           |       |                |           |       |                |           |       |                |  |           |       |                |
|--------------------------|-----------|-------|----------------|-----------|-------|----------------|-----------|-------|----------------|--|-----------|-------|----------------|
| Spain                    | 2000-2008 | 0.23  | -0.19 to 0.66  | 2008-2019 | -0.58 | -0.82 to -0.34 |           |       |                |  | 2000-2019 | -0.24 | -0.45 to -0.03 |
| Sweden                   | 2000-2004 | 1.46  | 0.12 to 2.81   | 2004-2013 | -0.56 | -0.99 to -0.13 | 2013-2019 | -1.86 | -2.51 to -1.20 |  | 2000-2019 | -0.55 | -0.91 to -0.19 |
| Switzerland              | 2000-2012 | -1.13 | -1.38 to -0.88 | 2012-2015 | -3.64 | -7.60 to 0.50  | 2015-2019 | 0.00  | -1.32 to 1.34  |  | 2000-2019 | -1.29 | -1.95 to -0.64 |
| Trinidad and Tobago      | 2000-2008 | 2.09  | 1.46 to 2.71   | 2008-2019 | -0.29 | -0.60 to 0.03  |           |       |                |  | 2000-2019 | 0.71  | 0.41 to 1.00   |
| United Kingdom           | 2000-2008 | -0.31 | -0.54 to -0.08 | 2008-2014 | -1.37 | -1.82 to -0.92 | 2014-2019 | 0.43  | -0.02 to 0.88  |  | 2000-2019 | -0.45 | -0.64 to -0.27 |
| United States of America | 2000-2007 | -1.72 | -2.04 to -1.39 | 2007-2017 | -1.03 | -1.24 to -0.82 | 2017-2019 | 0.25  | -2.01 to 2.55  |  | 2000-2019 | -1.15 | -1.41 to -0.89 |
| Uruguay                  | 2000-2019 | -0.33 | -0.44 to -0.21 |           |       |                |           |       |                |  | 2000-2019 | -0.33 | -0.44 to -0.21 |

---

**Supplementary Table 7. Joinpoint analysis for breast cancer, age-standardized mortality in 2000-2019 for female, 40 years or older**

| Country             | Trend 1   |       |                | Trend 2   |       |                | Trend 3   |       |                | Trend 4   |       |                | Year      | AAPC  | Range          |
|---------------------|-----------|-------|----------------|-----------|-------|----------------|-----------|-------|----------------|-----------|-------|----------------|-----------|-------|----------------|
|                     | Year      | EAPC  | range          |           |       |                |
| Antigua and Barbuda | 2000-2006 | -0.36 | -0.57 to -0.14 | 2006-2009 | 0.95  | -0.24 to 2.14  | 2009-2015 | 2.72  | 2.48 to 2.97   | 2015-2019 | -0.61 | -0.91 to -0.32 | 2000-2019 | 0.76  | 0.56 to 0.95   |
| Argentina           | 2000-2003 | 0.26  | -1.06 to 1.59  | 2003-2014 | -1.32 | -1.52 to -1.12 | 2014-2019 | 0.07  | -0.48 to 0.62  |           |       |                | 2000-2019 | -0.71 | -0.96 to -0.46 |
| Australia           | 2000-2005 | -2.24 | -2.80 to -1.67 | 2005-2017 | -1.11 | -1.27 to -0.95 | 2017-2019 | 0.27  | -1.99 to 2.57  |           |       |                | 2000-2019 | -1.26 | -1.53 to -1.00 |
| Austria             | 2000-2019 | -1.44 | -1.51 to -1.36 |           |       |                |           |       |                |           |       |                | 2000-2019 | -1.44 | -1.51 to -1.36 |
| Barbados            | 2000-2003 | 1.83  | 0.87 to 2.81   | 2003-2007 | -0.27 | -1.16 to 0.62  | 2007-2011 | 1.89  | 1.05 to 2.73   | 2011-2019 | -0.67 | -0.83 to -0.50 | 2000-2019 | 0.34  | 0.08 to 0.61   |
| Belgium             | 2000-2008 | -2.63 | -3.02 to -2.22 | 2008-2019 | -1.30 | -1.55 to -1.05 |           |       |                |           |       |                | 2000-2019 | -1.86 | -2.07 to -1.66 |
| Brazil              | 2000-2016 | -1.17 | -1.24 to -1.10 | 2016-2019 | -1.92 | -2.72 to -1.11 |           |       |                |           |       |                | 2000-2019 | -1.29 | -1.42 to -1.16 |
| Canada              | 2000-2003 | -1.72 | -2.35 to -1.09 | 2003-2006 | -2.76 | -3.99 to -1.52 | 2006-2014 | -1.77 | -1.93 to -1.61 | 2014-2019 | 0.23  | -0.03 to 0.50  | 2000-2019 | -1.40 | -1.61 to -1.19 |
| Chile               | 2000-2008 | -0.90 | -1.07 to -0.73 | 2008-2011 | 0.52  | -0.94 to 2.00  | 2011-2016 | -1.44 | -1.87 to -1.00 | 2016-2019 | -0.23 | -0.89 to 0.44  | 2000-2019 | -0.72 | -0.96 to -0.47 |
| China               | 2000-2004 | 1.42  | 0.77 to 2.08   | 2004-2007 | -1.46 | -3.35 to 0.47  | 2007-2016 | -0.39 | -0.58 to -0.19 | 2016-2019 | 1.29  | 0.50 to 2.09   | 2000-2019 | 0.09  | -0.23 to 0.41  |
| Colombia            | 2000-2007 | -1.03 | -1.65 to -0.40 | 2007-2016 | -0.09 | -0.53 to 0.36  | 2016-2019 | -1.51 | -3.33 to 0.35  |           |       |                | 2000-2019 | -0.66 | -1.04 to -0.27 |
| Costa Rica          | 2000-2019 | 0.22  | -0.06 to 0.50  |           |       |                |           |       |                |           |       |                | 2000-2019 | 0.22  | -0.06 to 0.50  |
| Croatia             | 2000-2015 | 0.32  | 0.07 to 0.57   | 2015-2019 | -3.80 | -5.54 to -2.03 |           |       |                |           |       |                | 2000-2019 | -0.56 | -0.96 to -0.17 |
| Cuba                | 2000-2019 | 0.08  | -0.10 to 0.26  |           |       |                |           |       |                |           |       |                | 2000-2019 | 0.08  | -0.10 to 0.26  |
| Denmark             | 2000-2005 | -2.24 | -2.62 to -1.86 | 2005-2009 | -1.16 | -2.01 to -0.31 | 2009-2014 | -4.21 | -4.74 to -3.68 | 2014-2019 | -1.21 | -1.62 to -0.81 | 2000-2019 | -2.27 | -2.50 to -2.04 |

|            |           |       |                |           |       |                |           |       |                |           |       |                |           |       |                |
|------------|-----------|-------|----------------|-----------|-------|----------------|-----------|-------|----------------|-----------|-------|----------------|-----------|-------|----------------|
| Ecuador    | 2000-2005 | 5.06  | 2.93 to 7.24   | 2005-2019 | 0.61  | 0.29 to 0.94   |           |       |                |           |       |                | 2000-2019 | 1.77  | 1.21 to 2.32   |
| Estonia    | 2000-2014 | -2.09 | -2.43 to -1.75 | 2014-2019 | 0.53  | -1.22 to 2.32  |           |       |                |           |       |                | 2000-2019 | -1.40 | -1.88 to -0.92 |
| Fiji       | 2000-2005 | 0.71  | -0.26 to 1.68  | 2005-2009 | 4.16  | 2.21 to 6.14   | 2009-2019 | 0.43  | 0.18 to 0.69   |           |       |                | 2000-2019 | 1.28  | 0.83 to 1.72   |
| Finland    | 2000-2008 | -1.29 | -1.58 to -1.01 | 2008-2012 | -0.73 | -2.00 to 0.56  | 2012-2015 | -2.36 | -4.84 to 0.19  | 2015-2019 | -0.84 | -1.67 to -0.01 | 2000-2019 | -1.25 | -1.70 to -0.79 |
| France     | 2000-2002 | -0.18 | -2.27 to 1.96  | 2002-2016 | -2.20 | -2.31 to -2.09 | 2016-2019 | -0.51 | -1.57 to 0.57  |           |       |                | 2000-2019 | -1.73 | -1.98 to -1.47 |
| Germany    | 2000-2007 | -1.43 | -1.67 to -1.19 | 2007-2019 | -0.86 | -0.96 to -0.75 |           |       |                |           |       |                | 2000-2019 | -1.07 | -1.17 to -0.97 |
| Greece     | 2000-2007 | -0.81 | -1.13 to -0.49 | 2007-2014 | -1.59 | -2.01 to -1.18 | 2014-2019 | 0.76  | 0.19 to 1.33   |           |       |                | 2000-2019 | -0.69 | -0.91 to -0.47 |
| Grenada    | 2000-2005 | 0.63  | 0.21 to 1.06   | 2005-2011 | 3.55  | 3.17 to 3.94   | 2011-2017 | 1.80  | 1.47 to 2.13   | 2017-2019 | -1.95 | -3.31 to -0.57 | 2000-2019 | 1.64  | 1.42 to 1.85   |
| Guatemala  | 2000-2008 | 1.15  | 0.96 to 1.33   | 2008-2011 | 2.06  | 0.59 to 3.56   | 2011-2016 | 0.81  | 0.39 to 1.23   | 2016-2019 | -1.43 | -2.03 to -0.83 | 2000-2019 | 0.79  | 0.54 to 1.04   |
| Guyana     | 2000-2006 | -1.69 | -2.49 to -0.89 | 2006-2014 | 1.20  | 0.60 to 1.80   | 2014-2019 | -1.55 | -2.44 to -0.65 |           |       |                | 2000-2019 | -0.45 | -0.83 to -0.06 |
| Hungary    | 2000-2003 | 0.49  | -1.84 to 2.89  | 2003-2009 | -3.79 | -4.84 to -2.73 | 2009-2019 | -0.62 | -1.02 to -0.22 |           |       |                | 2000-2019 | -1.46 | -1.95 to -0.97 |
| Iceland    | 2000-2005 | -2.46 | -2.99 to -1.92 | 2005-2010 | -3.78 | -4.53 to -3.02 | 2010-2019 | -1.55 | -1.78 to -1.33 |           |       |                | 2000-2019 | -2.38 | -2.62 to -2.14 |
| Israel     | 2000-2016 | -2.77 | -2.88 to -2.67 | 2016-2019 | 0.52  | -0.77 to 1.84  |           |       |                |           |       |                | 2000-2019 | -2.26 | -2.46 to -2.06 |
| Italy      | 2000-2006 | -2.13 | -2.59 to -1.68 | 2006-2019 | -1.19 | -1.33 to -1.04 |           |       |                |           |       |                | 2000-2019 | -1.49 | -1.65 to -1.33 |
| Japan      | 2000-2012 | 1.09  | 0.92 to 1.25   | 2012-2019 | -1.15 | -1.50 to -0.80 |           |       |                |           |       |                | 2000-2019 | 0.26  | 0.10 to 0.41   |
| Kuwait     | 2000-2009 | 0.66  | -0.19 to 1.52  | 2009-2016 | -5.19 | -6.46 to -3.90 | 2016-2019 | 0.04  | -3.43 to 3.64  |           |       |                | 2000-2019 | -1.63 | -2.38 to -0.88 |
| Kyrgyzstan | 2000-2019 | -1.25 | -1.38 to -1.13 |           |       |                |           |       |                |           |       |                | 2000-2019 | -1.25 | -1.38 to -1.13 |
| Latvia     | 2000-2006 | 1.94  | 1.07 to 2.81   | 2006-2019 | -1.52 | -1.78 to -1.25 |           |       |                |           |       |                | 2000-2019 | -0.44 | -0.74 to -0.14 |
| Lithuania  | 2000-2008 | 1.09  | 0.41 to 1.78   | 2008-2019 | -2.02 | -2.44 to -1.59 |           |       |                |           |       |                | 2000-2019 | -0.72 | -1.06 to -0.37 |



|                     |           |       |                |           |       |                |           |       |                |           |       |                |           |       |                |
|---------------------|-----------|-------|----------------|-----------|-------|----------------|-----------|-------|----------------|-----------|-------|----------------|-----------|-------|----------------|
| Luxembourg          | 2000-2004 | -2.63 | -3.82 to -1.43 | 2004-2010 | -0.78 | -1.63 to 0.08  | 2010-2017 | -3.07 | -3.69 to -2.44 | 2017-2019 | -1.06 | -4.69 to 2.72  | 2000-2019 | -2.05 | -2.55 to -1.54 |
| Malta               | 2000-2013 | -2.53 | -2.66 to -2.40 | 2013-2019 | -1.26 | -1.71 to -0.80 |           |       |                |           |       |                | 2000-2019 | -2.13 | -2.28 to -1.97 |
| Mauritius           | 2000-2003 | 5.00  | 2.15 to 7.94   | 2003-2007 | -0.94 | -3.34 to 1.53  | 2007-2017 | 2.44  | 2.06 to 2.83   | 2017-2019 | -1.24 | -4.76 to 2.40  | 2000-2019 | 1.73  | 1.02 to 2.44   |
| Mexico              | 2000-2019 | 0.41  | 0.29 to 0.52   |           |       |                |           |       |                |           |       |                | 2000-2019 | 0.41  | 0.29 to 0.52   |
| Netherlands         | 2000-2003 | -3.99 | -4.60 to -3.37 | 2003-2011 | -1.00 | -1.17 to -0.83 | 2011-2014 | -2.31 | -3.52 to -1.08 | 2014-2019 | -0.10 | -0.38 to 0.17  | 2000-2019 | -1.45 | -1.66 to -1.24 |
| New Zealand         | 2000-2013 | -1.91 | -2.07 to -1.75 | 2013-2019 | -0.61 | -1.11 to -0.11 |           |       |                |           |       |                | 2000-2019 | -1.50 | -1.68 to -1.32 |
| Norway              | 2000-2008 | -2.33 | -2.54 to -2.12 | 2008-2013 | -1.58 | -2.19 to -0.96 | 2013-2017 | -3.14 | -4.10 to -2.18 | 2017-2019 | -0.48 | -2.44 to 1.51  | 2000-2019 | -2.11 | -2.41 to -1.81 |
| Panama              | 2000-2002 | -1.10 | -5.05 to 3.02  | 2002-2014 | 1.67  | 1.44 to 1.91   | 2014-2019 | -1.57 | -2.19 to -0.95 |           |       |                | 2000-2019 | 0.52  | 0.08 to 0.95   |
| Philippines         | 2000-2007 | -2.25 | -2.50 to -2.01 | 2007-2011 | 0.85  | -0.02 to 1.73  | 2011-2015 | 2.55  | 1.75 to 3.35   | 2015-2019 | 0.19  | -0.25 to 0.64  | 2000-2019 | -0.09 | -0.33 to 0.15  |
| Poland              | 2000-2019 | -0.81 | -0.91 to -0.71 |           |       |                |           |       |                |           |       |                | 2000-2019 | -0.81 | -0.91 to -0.71 |
| Puerto Rico         | 2000-2019 | -0.46 | -0.68 to -0.24 |           |       |                |           |       |                |           |       |                | 2000-2019 | -0.46 | -0.68 to -0.24 |
| Republic of Korea   | 2000-2003 | 1.41  | 0.70 to 2.13   | 2003-2013 | 0.67  | 0.56 to 0.78   | 2013-2016 | -1.21 | -2.26 to -0.15 | 2016-2019 | 0.02  | -0.49 to 0.53  | 2000-2019 | 0.38  | 0.19 to 0.58   |
| Republic of Moldova | 2000-2009 | 1.74  | 1.25 to 2.23   | 2009-2012 | -4.04 | -8.73 to 0.89  | 2012-2015 | 2.06  | -2.99 to 7.38  | 2015-2019 | -4.89 | -6.42 to -3.33 | 2000-2019 | -0.57 | -1.59 to 0.47  |
| Romania             | 2000-2019 | -0.13 | -0.28 to 0.02  |           |       |                |           |       |                |           |       |                | 2000-2019 | -0.13 | -0.28 to 0.02  |
| Saint Lucia         | 2000-2009 | -1.57 | -2.03 to -1.12 | 2009-2019 | 1.57  | 1.24 to 1.90   |           |       |                |           |       |                | 2000-2019 | 0.07  | -0.19 to 0.33  |
| Serbia              | 2000-2002 | -1.60 | -4.45 to 1.35  | 2002-2005 | 2.27  | -0.65 to 5.28  | 2005-2019 | -0.65 | -0.79 to -0.52 |           |       |                | 2000-2019 | -0.30 | -0.80 to 0.21  |
| Singapore           | 2000-2002 | 1.60  | -2.37 to 5.73  | 2002-2006 | -1.83 | -3.67 to 0.04  | 2006-2012 | 0.09  | -0.66 to 0.86  | 2012-2019 | -2.33 | -2.72 to -1.93 | 2000-2019 | -1.05 | -1.60 to -0.50 |
| Slovakia            | 2000-2004 | -3.43 | -4.87 to -1.97 | 2004-2012 | 1.12  | 0.51 to 1.74   | 2012-2019 | -1.32 | -1.88 to -0.75 |           |       |                | 2000-2019 | -0.75 | -1.16 to -0.34 |
| Slovenia            | 2000-2019 | -2.46 | -2.65 to -2.27 |           |       |                |           |       |                |           |       |                | 2000-2019 | -2.46 | -2.65 to -2.27 |

|                          |           |       |                |           |       |                |           |       |                |           |       |                |           |       |                |
|--------------------------|-----------|-------|----------------|-----------|-------|----------------|-----------|-------|----------------|-----------|-------|----------------|-----------|-------|----------------|
| Spain                    | 2000-2005 | -2.26 | -2.67 to -1.85 | 2005-2014 | -1.29 | -1.49 to -1.09 | 2014-2019 | -0.27 | -0.66 to 0.13  |           |       |                | 2000-2019 | -1.28 | -1.44 to -1.12 |
| Sweden                   | 2000-2004 | 0.25  | -0.29 to 0.79  | 2004-2008 | -1.41 | -2.23 to -0.59 | 2008-2013 | -0.59 | -1.10 to -0.08 | 2013-2019 | -1.95 | -2.22 to -1.68 | 2000-2019 | -1.02 | -1.25 to -0.79 |
| Switzerland              | 2000-2005 | -2.93 | -3.41 to -2.45 | 2005-2012 | -1.24 | -1.62 to -0.87 | 2012-2015 | -2.69 | -4.80 to -0.53 | 2015-2019 | -0.59 | -1.27 to 0.10  | 2000-2019 | -1.78 | -2.14 to -1.42 |
| Trinidad and Tobago      | 2000-2008 | 0.42  | -0.14 to 0.98  | 2008-2019 | -0.67 | -0.97 to -0.38 |           |       |                |           |       |                | 2000-2019 | -0.21 | -0.48 to 0.05  |
| United Kingdom           | 2000-2010 | -2.51 | -2.62 to -2.40 | 2010-2014 | -1.73 | -2.46 to -1.00 | 2014-2019 | 0.02  | -0.30 to 0.35  |           |       |                | 2000-2019 | -1.68 | -1.85 to -1.52 |
| United States of America | 2000-2007 | -2.07 | -2.30 to -1.84 | 2007-2013 | -1.55 | -1.93 to -1.17 | 2013-2019 | -0.43 | -0.71 to -0.15 |           |       |                | 2000-2019 | -1.39 | -1.55 to -1.24 |
| Uruguay                  | 2000-2005 | -0.66 | -1.22 to -0.10 | 2005-2013 | -1.63 | -1.96 to -1.30 | 2013-2019 | -0.26 | -0.68 to 0.17  |           |       |                | 2000-2019 | -0.94 | -1.16 to -0.73 |

---

**Supplementary Table 8. Analysis of the association between the risk factor exposure at the national level and female breast cancer incidence**

| Risk factor         | 2015         |                    |               | 2016         |                    |               | 2017         |                    |               |
|---------------------|--------------|--------------------|---------------|--------------|--------------------|---------------|--------------|--------------------|---------------|
|                     | $\beta$      | 95% CI             | P             | $\beta$      | 95% CI             | P             | $\beta$      | 95% CI             | P             |
| Alcohol             | -0.703       | -2.878 1.472       | 0.523         | -0.743       | -2.874 1.388       | 0.491         | -0.926       | -3.204 1.352       | 0.422         |
| Smoking             | 0.358        | -0.058 0.775       | 0.091         | 0.317        | -0.091 0.726       | 0.126         | 0.365        | -0.071 0.802       | 0.100         |
| Physical inactivity | 0.120        | -0.157 0.397       | 0.391         | 0.119        | -0.152 0.390       | 0.386         | 0.124        | -0.166 0.414       | 0.400         |
| Obesity             | 0.077        | -0.275 0.428       | 0.665         | 0.085        | -0.260 0.429       | 0.627         | 0.108        | -0.260 0.476       | 0.562         |
| High cholesterol    | <b>2.481</b> | <b>1.426 3.537</b> | <b>0.000*</b> | <b>2.374</b> | <b>1.340 3.409</b> | <b>0.000*</b> | <b>2.291</b> | <b>1.186 3.397</b> | <b>0.000*</b> |
| Education           | -0.237       | -0.482 0.008       | 0.058         | -0.227       | -0.467 0.013       | 0.064         | -0.227       | -0.484 0.029       | 0.082         |
| Unemployment        | 0.240        | -0.269 0.749       | 0.351         | 0.212        | -0.287 0.710       | 0.402         | 0.145        | -0.388 0.678       | 0.590         |
| Out-of-pocket       | -0.044       | -0.233 0.144       | 0.643         | -0.027       | -0.212 0.158       | 0.774         | -0.060       | -0.258 0.137       | 0.547         |
| GDP                 | 0.658        | -0.158 1.475       | 0.113         | 0.653        | -0.148 1.453       | 0.109         | 0.616        | -0.240 1.471       | 0.156         |
| Health expenditure  | <b>1.706</b> | <b>0.309 3.102</b> | <b>0.017*</b> | <b>1.724</b> | <b>0.356 3.093</b> | <b>0.014*</b> | <b>1.608</b> | <b>0.145 3.071</b> | <b>0.032*</b> |
| Health system       | 0.595        | -2.664 3.854       | 0.718         | 0.621        | -2.573 3.814       | 0.700         | 0.635        | -2.778 4.049       | 0.713         |
| UHC                 | 0.078        | -0.351 0.508       | 0.718         | 0.114        | -0.307 0.535       | 0.591         | 0.101        | -0.349 0.551       | 0.656         |
| BC screening        | -4.681       | -12.077 2.715      | 0.212         | -4.667       | -11.913 2.580      | 0.204         | -5.521       | -13.268 2.226      | 0.160         |

  

| Risk factor         | 2018         |                    |               | 2019         |                    |               |
|---------------------|--------------|--------------------|---------------|--------------|--------------------|---------------|
|                     | $\beta$      | 95% CI             | P             | $\beta$      | 95% CI             | P             |
| Alcohol             | -1.159       | -3.716 1.397       | 0.370         | -1.139       | -3.620 1.342       | 0.365         |
| Smoking             | 0.452        | -0.038 0.941       | 0.070         | 0.424        | -0.051 0.900       | 0.079         |
| Physical inactivity | 0.122        | -0.203 0.448       | 0.458         | 0.114        | -0.202 0.430       | 0.475         |
| Obesity             | 0.137        | -0.276 0.550       | 0.511         | 0.137        | -0.264 0.538       | 0.498         |
| High cholesterol    | <b>2.193</b> | <b>0.952 3.433</b> | <b>0.001*</b> | <b>2.203</b> | <b>0.999 3.408</b> | <b>0.000*</b> |
| Education           | -0.229       | -0.517 0.059       | 0.117         | -0.222       | -0.502 0.057       | 0.118         |
| Unemployment        | 0.049        | -0.549 0.648       | 0.870         | 0.078        | -0.503 0.658       | 0.791         |
| Out-of-pocket       | -0.106       | -0.328 0.116       | 0.344         | -0.089       | -0.305 0.126       | 0.411         |
| GDP                 | 0.541        | -0.419 1.501       | 0.266         | 0.533        | -0.398 1.465       | 0.259         |
| Health expenditure  | 1.466        | -0.176 3.108       | 0.079         | 1.430        | -0.163 3.023       | 0.078         |
| Health system       | 0.553        | -3.278 4.384       | 0.775         | 0.569        | -3.148 4.287       | 0.762         |
| UHC                 | 0.094        | -0.411 0.599       | 0.713         | 0.094        | -0.396 0.584       | 0.703         |
| BC screening        | -6.275       | -14.968 2.419      | 0.155         | -6.070       | -14.507 2.367      | 0.156         |

# The analysis was conducted using multivariable linear regression model at a country level.

$\beta$ , beta coefficient. The beta coefficient can be interpreted as the change in ASR of incidence or mortality associated with one percent increase of a certain risk factor.

CI, confidence interval; ASR, age-standardized rate.

\* P values less than .05

**Supplementary Table 9. Analysis of the association between the risk factor exposure at the national level and female breast cancer mortality**

| Risk factor         | 2015          |                      |               | 2016          |                      |               | 2017         |                    |               |
|---------------------|---------------|----------------------|---------------|---------------|----------------------|---------------|--------------|--------------------|---------------|
|                     | $\beta$       | 95% CI               | P             | $\beta$       | 95% CI               | P             | $\beta$      | 95% CI             | P             |
| Alcohol             | -0.326        | -1.903 1.251         | 0.682         | -0.336        | -1.894 1.221         | 0.669         | -0.456       | -2.126 1.213       | 0.589         |
| Smoking             | 0.109         | -0.193 0.411         | 0.475         | 0.088         | -0.211 0.386         | 0.561         | 0.133        | -0.187 0.453       | 0.411         |
| Physical inactivity | 0.022         | -0.179 0.222         | 0.831         | 0.024         | -0.175 0.222         | 0.814         | 0.028        | -0.185 0.240       | 0.797         |
| Obesity             | <b>0.344</b>  | <b>0.089 0.599</b>   | <b>0.009*</b> | <b>0.335</b>  | <b>0.083 0.587</b>   | <b>0.010*</b> | <b>0.345</b> | <b>0.075 0.615</b> | <b>0.013*</b> |
| High cholesterol    | 0.753         | -0.013 1.518         | 0.054         | 0.710         | -0.045 1.466         | 0.065         | 0.652        | -0.158 1.463       | 0.113         |
| Education           | -0.086        | -0.264 0.092         | 0.338         | -0.083        | -0.258 0.093         | 0.351         | -0.085       | -0.273 0.103       | 0.374         |
| Unemployment        | 0.122         | -0.247 0.490         | 0.514         | 0.110         | -0.254 0.474         | 0.550         | 0.051        | -0.339 0.442       | 0.795         |
| Out-of-pocket       | -0.038        | -0.174 0.099         | 0.585         | -0.030        | -0.165 0.105         | 0.659         | -0.060       | -0.205 0.084       | 0.410         |
| GDP                 | 0.203         | -0.389 0.795         | 0.497         | 0.207         | -0.378 0.791         | 0.485         | 0.168        | -0.459 0.795       | 0.595         |
| Health expenditure  | 0.221         | -0.792 1.233         | 0.666         | 0.236         | -0.764 1.237         | 0.640         | 0.163        | -0.909 1.235       | 0.763         |
| Health system       | -0.716        | -3.079 1.647         | 0.549         | -0.769        | -3.103 1.565         | 0.514         | -0.790       | -3.291 1.712       | 0.532         |
| UHC                 | <b>-0.330</b> | <b>-0.641 -0.018</b> | <b>0.038*</b> | <b>-0.314</b> | <b>-0.622 -0.006</b> | <b>0.045*</b> | -0.329       | -0.659 0.001       | 0.050         |
| BC screening        | -4.224        | -9.586 1.138         | 0.121         | -4.231        | -9.527 1.066         | 0.116         | -4.839       | -10.516 0.839      | 0.094         |

  

| Risk factor         | 2018         |                    |               | 2019         |                    |               |
|---------------------|--------------|--------------------|---------------|--------------|--------------------|---------------|
|                     | $\beta$      | 95% CI             | P             | $\beta$      | 95% CI             | P             |
| Alcohol             | -0.578       | -2.453 1.297       | 0.542         | -0.533       | -2.351 1.284       | 0.561         |
| Smoking             | 0.201        | -0.158 0.560       | 0.269         | 0.183        | -0.165 0.531       | 0.300         |
| Physical inactivity | 0.028        | -0.211 0.267       | 0.817         | 0.021        | -0.210 0.253       | 0.855         |
| Obesity             | <b>0.359</b> | <b>0.056 0.662</b> | <b>0.021*</b> | <b>0.350</b> | <b>0.056 0.644</b> | <b>0.020*</b> |
| High cholesterol    | 0.588        | -0.322 1.498       | 0.203         | 0.598        | -0.284 1.480       | 0.182         |
| Education           | -0.087       | -0.298 0.124       | 0.417         | -0.083       | -0.288 0.121       | 0.421         |
| Unemployment        | -0.023       | -0.461 0.416       | 0.918         | -0.002       | -0.427 0.424       | 0.994         |
| Out-of-pocket       | -0.097       | -0.260 0.065       | 0.238         | -0.087       | -0.245 0.070       | 0.275         |
| GDP                 | 0.111        | -0.593 0.815       | 0.756         | 0.112        | -0.570 0.795       | 0.745         |
| Health expenditure  | 0.077        | -1.126 1.281       | 0.899         | 0.082        | -1.085 1.249       | 0.889         |
| Health system       | -0.867       | -3.676 1.942       | 0.542         | -0.890       | -3.614 1.834       | 0.518         |
| UHC                 | -0.344       | -0.715 0.026       | 0.068         | -0.344       | -0.703 0.015       | 0.060         |
| BC screening        | -5.408       | -11.783 0.967      | 0.095         | -5.213       | -11.394 0.968      | 0.097         |

# The analysis was conducted using multivariable linear regression model at a country level.

$\beta$ , beta coefficient. The beta coefficient can be interpreted as the change in ASR of incidence or mortality associated with one percent increase of a certain risk factor.

CI, confidence interval; ASR, age-standardized rate.

\* P values less than .05
